# Supplementary material
Source: PubMed Central journal article supplement (PMC3159577)
Supplement: NIHMS278833-supplement-2.pdf [file NIHMS278833-supplement-2.pdf]

# The Lanthanide Contraction Revisited

Michael Seitz, Allen G. Oliver, and Kenneth N. Raymond\*

Department of Chemistry, University of California,  
Berkeley, CA 94720-1460

E-mail: raymond@socrates.berkeley.edu. Fax: (510) 486-5283.

## Supporting Information

| Table of Contents:                                                                  | Page |
|-------------------------------------------------------------------------------------|------|
| 1. TREN-1,2-HOIQO Lanthanide Complexes                                              | S2   |
| 1.1 Structure                                                                       | S2   |
| 1.2 Bond Lengths                                                                    | S2   |
| 1.3 O-O Distances                                                                   | S2   |
| 1.4 Dihedral Angles along the Edges of the<br>Coordination Polyhedron               | S3   |
| 1.5 Trends in Bond Lengths vs. f Electron Configuration                             | S3   |
| 2. TREN-SAL Lanthanide Complexes                                                    | S14  |
| 2.1 Structure                                                                       | S14  |
| 2.2 Bond Lengths                                                                    | S14  |
| 2.3 X-X Distances                                                                   | S15  |
| 2.4 Trends in Bond Lengths vs. f Electron Configuration                             | S15  |
| 3. [Ln(tptz)(NO <sub>3</sub> ) <sub>3</sub> (H <sub>2</sub> O)] Complexes           | S19  |
| 3.1 Structure                                                                       | S19  |
| 3.2 Bond Lengths                                                                    | S19  |
| 3.3 X-X Distances                                                                   | S20  |
| 3.4 Trends in Bond Lengths vs. f Electron Configuration                             | S20  |
| 4. [Ln(PhMeCH-DOTAM)(H <sub>2</sub> O)](OTf) <sub>3</sub> Complexes                 | S32  |
| 4.1 Structure                                                                       | S32  |
| 4.2 Bond Lengths                                                                    | S32  |
| 4.3 X-X Distances                                                                   | S33  |
| 4.4 Trends in Bond Lengths vs. f Electron Configuration                             | S33  |
| 5. [Ln(H <sub>2</sub> O) <sub>9</sub> ](EtOSO <sub>3</sub> ) <sub>3</sub> Complexes | S44  |
| 5.1 Bond Lengths                                                                    | S44  |
| 5.2 O-O Distances                                                                   | S44  |
| 5.3 Trends in Bond Lengths vs. f Electron Configuration                             | S45  |
| 6. The Average X-X Distance vs. the Average Ln-X Bond Length                        | S48  |
| 7. References                                                                       | S51  |

# 1. TREN-1,2-HOIQO Lanthanide Complexes

## 1.1 Structure

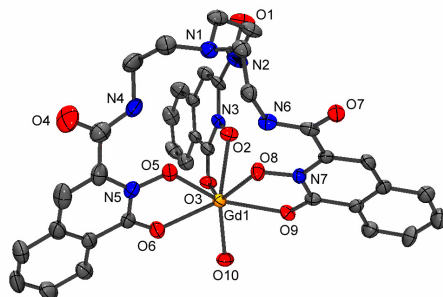

Asymmetric unit of  $[\text{Gd}(\text{TREN-1,2-HOIQO})(\text{H}_2\text{O})]\cdot\text{H}_2\text{O}$ . Thermal ellipsoid plot (Ortep 3 for Windows,<sup>1</sup> 50% probability level) with atom numbering scheme. Hydrogens and the isolated water molecule omitted for clarity.

## 1.2 Bond Lengths

Table S1. Bond lengths in  $[\text{Ln}(\text{TREN-1,2-HOIQO})(\text{H}_2\text{O})]\cdot\text{H}_2\text{O}$ .

| f electrons (Ln)              | $d_{\text{Ln-O3}}(\text{su})$ [Å] | $d_{\text{Ln-O6}}(\text{su})$ [Å] | $d_{\text{Ln-O9}}(\text{su})$ [Å] | $d_{\text{Ln-O2}}(\text{su})$ [Å] | $d_{\text{Ln-O5}}(\text{su})$ [Å] | $d_{\text{Ln-O8}}(\text{su})$ [Å] | $d_{\text{Ln-O10}}(\text{su})$ [Å] | $d_{\text{Ln-O7}}(\text{su})$ [Å] | $\Sigma d_{\text{Ln-O}}(\text{su})$ [Å] |
|-------------------------------|-----------------------------------|-----------------------------------|-----------------------------------|-----------------------------------|-----------------------------------|-----------------------------------|------------------------------------|-----------------------------------|-----------------------------------------|
| 0 (La)                        | 2.482(4)                          | 2.463(4)                          | 2.479(4)                          | 2.447(4)                          | 2.443(5)                          | 2.473(4)                          | 2.581(4)                           | 2.516(4)                          | 19.884(34)                              |
| 1 (Ce) <sup>2</sup>           | 2.469(4)                          | 2.445(4)                          | 2.450(4)                          | 2.432(4)                          | 2.426(4)                          | 2.445(4)                          | 2.573(4)                           | 2.478(4)                          | 19.718(32)                              |
| 2 (Pr)                        | 2.452(4)                          | 2.427(4)                          | 2.428(4)                          | 2.407(4)                          | 2.405(4)                          | 2.437(3)                          | 2.556(4)                           | 2.473(4)                          | 19.585(31)                              |
| 3 (Nd)                        | 2.434(4)                          | 2.397(4)                          | 2.415(4)                          | 2.395(4)                          | 2.394(4)                          | 2.418(4)                          | 2.536(4)                           | 2.461(4)                          | 19.450(32)                              |
| 4 (Pm)                        | -                                 | -                                 | -                                 | -                                 | -                                 | -                                 | -                                  | -                                 | -                                       |
| 5 (Sm)                        | 2.396(4)                          | 2.381(4)                          | 2.374(4)                          | 2.377(4)                          | 2.377(4)                          | 2.396(4)                          | 2.518(4)                           | 2.434(4)                          | 19.253(32)                              |
| 6 (Eu)                        | 2.384(5)                          | 2.368(5)                          | 2.356(5)                          | 2.361(5)                          | 2.367(5)                          | 2.386(5)                          | 2.501(5)                           | 2.420(5)                          | 19.143(40)                              |
| 7 (Gd)                        | 2.373(5)                          | 2.357(5)                          | 2.349(5)                          | 2.352(4)                          | 2.343(5)                          | 2.376(4)                          | 2.491(5)                           | 2.403(5)                          | 19.044(38)                              |
| 8 (Tb)                        | 2.356(4)                          | 2.338(4)                          | 2.333(4)                          | 2.336(4)                          | 2.332(4)                          | 2.361(4)                          | 2.462(4)                           | 2.381(4)                          | 18.899(32)                              |
| 9 (Dy)                        | 2.340(4)                          | 2.335(4)                          | 2.322(4)                          | 2.329(4)                          | 2.327(4)                          | 2.355(4)                          | 2.460(4)                           | 2.375(4)                          | 18.843(32)                              |
| 10 (Ho)                       | 2.327(5)                          | 2.318(5)                          | 2.313(5)                          | 2.312(5)                          | 2.311(5)                          | 2.333(5)                          | 2.456(5)                           | 2.353(5)                          | 18.723(30)                              |
| 11 (Er)                       | 2.314(4)                          | 2.309(5)                          | 2.307(4)                          | 2.307(4)                          | 2.313(4)                          | 2.330(4)                          | 2.442(5)                           | 2.353(4)                          | 18.675(34)                              |
| 12 (Tm)                       | 2.308(4)                          | 2.300(4)                          | 2.294(4)                          | 2.297(4)                          | 2.304(4)                          | 2.324(4)                          | 2.424(4)                           | 2.338(4)                          | 18.589(32)                              |
| 13 (Yb)                       | 2.277(6)                          | 2.282(6)                          | 2.265(6)                          | 2.300(6)                          | 2.286(6)                          | 2.301(6)                          | 2.437(6)                           | 2.333(6)                          | 18.481(48)                              |
| 14 (Lu)                       | 2.288(3)                          | 2.292(3)                          | 2.282(3)                          | 2.294(3)                          | 2.287(3)                          | 2.320(3)                          | 2.418(3)                           | 2.329(3)                          | 18.510(24)                              |
| $d_{\text{La}}/d_{\text{Lu}}$ | 1.085                             | 1.075                             | 1.086                             | 1.067                             | 1.068                             | 1.066                             | 1.067                              | 1.080                             | 1.074                                   |

## 1.3 O-O Distances

Table S2. Distances O-O (O bound to Ln) in  $[\text{Ln}(\text{TREN-1,2-HOIQO})(\text{H}_2\text{O})]\cdot\text{H}_2\text{O}$ .

| f electrons (Ln)              | $d_{\text{O7-O9}}$ [Å] | $d_{\text{O3-O5}}$ [Å] | $d_{\text{O7-O5}}$ [Å] | $d_{\text{O3-O9}}$ [Å] | $d_{\text{O5-O6}}$ [Å] | $d_{\text{O9-O10}}$ [Å] | $d_{\text{O2-O3}}$ [Å] | $d_{\text{O7-O8}}$ [Å] | $d_{\text{O7-O10}}$ [Å] | $d_{\text{O3-O6}}$ [Å] | $d_{\text{O7-O6}}$ [Å] | $d_{\text{O10-O3}}$ [Å] | $d_{\text{O2-O5}}$ [Å] | $d_{\text{O2-O9}}$ [Å] | $d_{\text{O9-O8}}$ [Å] | $d_{\text{O8-O5}}$ [Å] | $d_{\text{O6-O10}}$ [Å] | $d_{\text{O2-O8}}$ [Å] | $\Sigma d_{\text{O-O}}$ [Å] |
|-------------------------------|------------------------|------------------------|------------------------|------------------------|------------------------|-------------------------|------------------------|------------------------|-------------------------|------------------------|------------------------|-------------------------|------------------------|------------------------|------------------------|------------------------|-------------------------|------------------------|-----------------------------|
| 0 (La)                        | 3.120                  | 3.942                  | 3.408                  | 3.960                  | 2.568                  | 3.213                   | 2.557                  | 3.078                  | 3.124                   | 3.284                  | 3.143                  | 3.092                   | 3.158                  | 3.602                  | 2.576                  | 3.090                  | 2.905                   | 2.915                  | 56.735                      |
| 1 (Ce) <sup>2</sup>           | 3.109                  | 3.902                  | 3.379                  | 3.912                  | 2.555                  | 3.159                   | 2.562                  | 3.043                  | 3.104                   | 3.224                  | 3.122                  | 3.064                   | 3.128                  | 3.555                  | 2.574                  | 3.065                  | 2.907                   | 2.881                  | 56.245                      |
| 2 (Pr)                        | 3.112                  | 3.908                  | 3.353                  | 3.840                  | 2.557                  | 3.119                   | 2.551                  | 3.039                  | 3.086                   | 3.217                  | 3.100                  | 3.023                   | 3.106                  | 3.509                  | 2.576                  | 3.031                  | 2.884                   | 2.862                  | 55.873                      |
| 3 (Nd)                        | 3.112                  | 3.897                  | 3.335                  | 3.793                  | 2.551                  | 3.086                   | 2.549                  | 3.006                  | 3.072                   | 3.190                  | 3.077                  | 2.992                   | 3.086                  | 3.477                  | 2.576                  | 2.997                  | 2.856                   | 2.843                  | 55.495                      |
| 4 (Pm)                        | -                      | -                      | -                      | -                      | -                      | -                       | -                      | -                      | -                       | -                      | -                      | -                       | -                      | -                      | -                      | -                      | -                       | -                      | -                           |
| 5 (Sm)                        | 3.085                  | 3.865                  | 3.319                  | 3.703                  | 2.562                  | 3.023                   | 2.567                  | 2.986                  | 3.040                   | 3.135                  | 3.054                  | 2.931                   | 3.040                  | 3.428                  | 2.573                  | 2.959                  | 2.839                   | 2.795                  | 54.904                      |
| 6 (Eu)                        | 3.083                  | 3.866                  | 3.294                  | 3.646                  | 2.560                  | 2.976                   | 2.551                  | 2.967                  | 3.031                   | 3.137                  | 3.038                  | 2.910                   | 3.023                  | 3.392                  | 2.570                  | 2.940                  | 2.838                   | 2.775                  | 54.597                      |
| 7 (Gd)                        | 3.085                  | 3.852                  | 3.258                  | 3.610                  | 2.562                  | 2.973                   | 2.546                  | 2.953                  | 3.015                   | 3.120                  | 3.023                  | 2.888                   | 3.012                  | 3.363                  | 2.565                  | 2.914                  | 2.804                   | 2.758                  | 54.301                      |
| 8 (Tb)                        | 3.067                  | 3.823                  | 3.253                  | 3.578                  | 2.556                  | 2.936                   | 2.534                  | 2.928                  | 2.976                   | 3.074                  | 3.004                  | 2.850                   | 2.995                  | 3.326                  | 2.567                  | 2.890                  | 2.774                   | 2.749                  | 53.880                      |
| 9 (Dy)                        | 3.074                  | 3.817                  | 3.237                  | 3.535                  | 2.558                  | 2.901                   | 2.544                  | 2.918                  | 2.969                   | 3.063                  | 3.001                  | 2.842                   | 2.984                  | 3.302                  | 2.570                  | 2.881                  | 2.788                   | 2.724                  | 53.708                      |
| 10 (Ho)                       | 3.061                  | 3.795                  | 3.208                  | 3.515                  | 2.552                  | 2.891                   | 2.539                  | 2.884                  | 2.959                   | 3.033                  | 2.977                  | 2.826                   | 2.955                  | 3.284                  | 2.558                  | 2.855                  | 2.767                   | 2.702                  | 53.361                      |
| 11 (Er)                       | 3.060                  | 3.792                  | 3.211                  | 3.489                  | 2.544                  | 2.876                   | 2.549                  | 2.884                  | 2.948                   | 3.018                  | 2.976                  | 2.802                   | 2.953                  | 3.272                  | 2.564                  | 2.853                  | 2.753                   | 2.684                  | 53.228                      |
| 12 (Tm)                       | 3.059                  | 3.775                  | 3.217                  | 3.470                  | 2.562                  | 2.854                   | 2.538                  | 2.881                  | 2.924                   | 2.998                  | 2.966                  | 2.792                   | 2.933                  | 3.248                  | 2.572                  | 2.835                  | 2.736                   | 2.682                  | 53.042                      |
| 13 (Yb)                       | 3.042                  | 3.738                  | 3.188                  | 3.412                  | 2.542                  | 2.824                   | 2.521                  | 2.856                  | 2.920                   | 2.958                  | 2.954                  | 2.788                   | 2.927                  | 3.221                  | 2.544                  | 2.809                  | 2.741                   | 2.669                  | 52.654                      |
| 14 (Lu)                       | 3.054                  | 3.752                  | 3.194                  | 3.417                  | 2.552                  | 2.831                   | 2.535                  | 2.860                  | 2.913                   | 2.974                  | 2.956                  | 2.761                   | 2.928                  | 3.216                  | 2.579                  | 2.812                  | 2.722                   | 2.674                  | 52.730                      |
| $d_{\text{La}}/d_{\text{Lu}}$ | 1.022                  | 1.051                  | 1.067                  | 1.159                  | 1.006                  | 1.135                   | 1.009                  | 1.076                  | 1.072                   | 1.104                  | 1.063                  | 1.120                   | 1.079                  | 1.120                  | 0.999                  | 1.090                  | 1.067                   | 1.090                  | 1.076                       |

## 1.4 Dihedral Angles along the Edges of the Coordination Polyhedron

Table S3. Dihedral angles along the edges of the coordination polyhedron [°]. Shape measure  $SM_{\text{tdh}}$  (deviation relative to an ideal trigonal-dodecahedron) and  $SM_{\text{Gd}}$  (deviation relative to the gadolinium complex).<sup>3</sup>

| edge              | ideal | La    | Ce <sup>2+</sup> | Pr    | Nd    | Sm    | Eu    | Gd    | Tb    | Dy    | Ho    | Er    | Tm    | Yb    | Lu    |
|-------------------|-------|-------|------------------|-------|-------|-------|-------|-------|-------|-------|-------|-------|-------|-------|-------|
| O7-O8             | 74.3  | 55.07 | 55.68            | 56.25 | 56.68 | 57.31 | 57.75 | 57.94 | 58.37 | 58.77 | 58.70 | 58.85 | 59.35 | 59.72 | 60.10 |
| O7-O5             | 29.9  | 41.41 | 41.56            | 41.77 | 42.10 | 42.00 | 42.24 | 42.42 | 42.09 | 42.36 | 42.54 | 42.75 | 42.31 | 43.00 | 41.60 |
| O7-O6             | 61.5  | 49.04 | 48.85            | 49.16 | 49.02 | 49.25 | 49.54 | 49.40 | 49.45 | 49.51 | 49.18 | 49.02 | 49.47 | 48.91 | 50.19 |
| O7-O10            | 61.5  | 56.74 | 57.09            | 57.40 | 57.55 | 57.88 | 57.89 | 57.86 | 57.90 | 58.21 | 58.17 | 58.30 | 58.38 | 59.55 | 57.81 |
| O7-O9             | 29.9  | 47.45 | 46.36            | 45.77 | 45.51 | 44.62 | 43.87 | 43.60 | 43.44 | 42.49 | 42.23 | 42.41 | 42.03 | 40.98 | 41.47 |
| O6-O10            | 53.2  | 61.63 | 61.31            | 61.04 | 60.82 | 60.79 | 60.78 | 61.22 | 60.70 | 60.74 | 60.98 | 60.80 | 60.54 | 60.87 | 61.31 |
| O9-O10            | 74.3  | 68.17 | 69.12            | 68.39 | 68.26 | 68.38 | 68.31 | 68.07 | 67.95 | 68.35 | 68.79 | 68.42 | 68.37 | 69.03 | 68.33 |
| O3-O9             | 29.9  | 30.36 | 29.78            | 30.81 | 31.32 | 31.28 | 31.93 | 32.46 | 32.32 | 32.54 | 32.67 | 33.06 | 33.07 | 31.99 | 33.02 |
| O2-O9             | 61.5  | 40.79 | 41.52            | 40.91 | 41.39 | 41.47 | 40.91 | 41.13 | 42.01 | 42.00 | 42.25 | 42.33 | 42.69 | 43.26 | 43.33 |
| O2-O8             | 53.2  | 63.81 | 63.67            | 63.64 | 63.10 | 63.33 | 63.25 | 63.29 | 62.81 | 62.97 | 62.61 | 62.80 | 62.40 | 62.70 | 62.62 |
| O2-O5             | 61.5  | 62.25 | 62.23            | 62.55 | 62.98 | 63.87 | 64.15 | 64.18 | 63.98 | 64.33 | 64.58 | 64.75 | 64.47 | 65.26 | 64.65 |
| O3-O5             | 29.9  | 13.68 | 13.98            | 13.05 | 13.10 | 12.47 | 12.02 | 11.46 | 11.93 | 11.56 | 11.64 | 11.57 | 12.06 | 11.18 | 11.71 |
| O2-O3             | 74.3  | 86.69 | 87.41            | 87.47 | 87.83 | 88.45 | 88.63 | 88.64 | 89.19 | 89.63 | 89.89 | 89.75 | 89.33 | 89.71 | 89.14 |
| O5-O6             | 74.3  | 80.45 | 80.35            | 80.54 | 80.37 | 80.85 | 81.14 | 81.17 | 81.17 | 81.44 | 81.28 | 81.53 | 81.25 | 81.25 | 81.69 |
| O3-O6             | 53.2  | 57.05 | 57.54            | 57.88 | 57.78 | 58.11 | 58.46 | 58.73 | 59.02 | 59.53 | 59.43 | 59.37 | 59.66 | 59.67 | 59.85 |
| O10-O3            | 74.3  | 72.70 | 72.39            | 72.08 | 71.85 | 71.41 | 71.10 | 70.54 | 70.02 | 69.50 | 69.50 | 69.21 | 68.65 | 68.80 | 67.86 |
| O9-O8             | 61.5  | 68.95 | 68.61            | 68.48 | 67.87 | 67.32 | 67.16 | 67.06 | 66.82 | 66.48 | 66.52 | 66.14 | 66.11 | 65.35 | 65.52 |
| O8-O5             | 61.5  | 57.52 | 57.45            | 57.87 | 57.78 | 57.83 | 57.87 | 57.83 | 58.56 | 58.19 | 58.03 | 57.95 | 58.62 | 57.91 | 58.68 |
| $SM_{\text{tdh}}$ | 0     | 11.01 | 10.77            | 10.81 | 10.70 | 10.66 | 10.70 | 10.77 | 10.56 | 10.58 | 10.57 | 10.64 | 10.44 | 10.41 | 10.34 |
| $SM_{\text{Gd}}$  | -     | 2.01  | 1.78             | 1.44  | 1.24  | 0.89  | 0.70  | 0     | 0.65  | 0.69  | 0.72  | 0.74  | 0.94  | 1.27  | 1.26  |

## 1.5 Trends in Bond Lengths and O-O Distances vs. f Electron Configuration

Bond lengths:

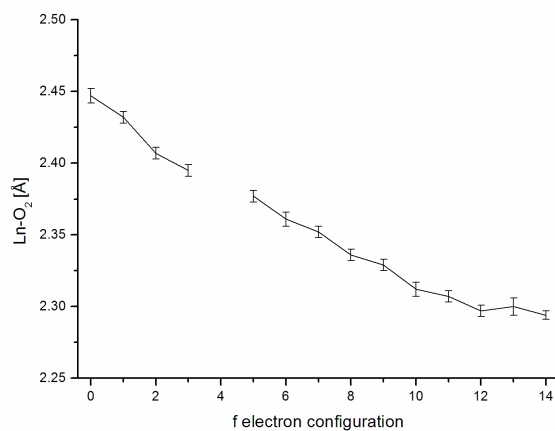

Figure S1. Bond length Ln-O2 vs. f electronic configuration.

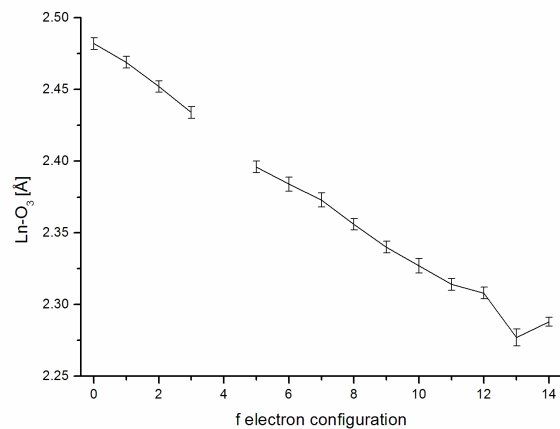

Figure S2. Bond length Ln-O3 vs. f electronic configuration.

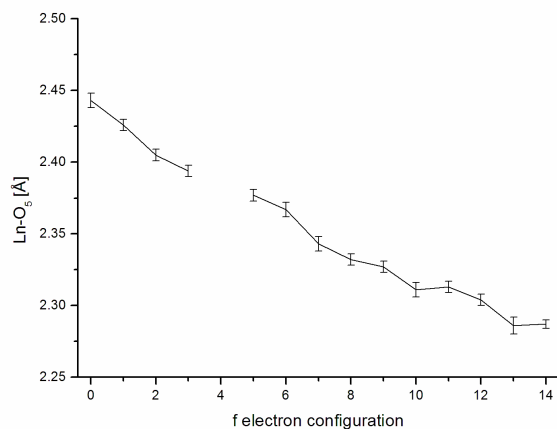

Figure S3. Bond length Ln-O5 vs. f electronic configuration.

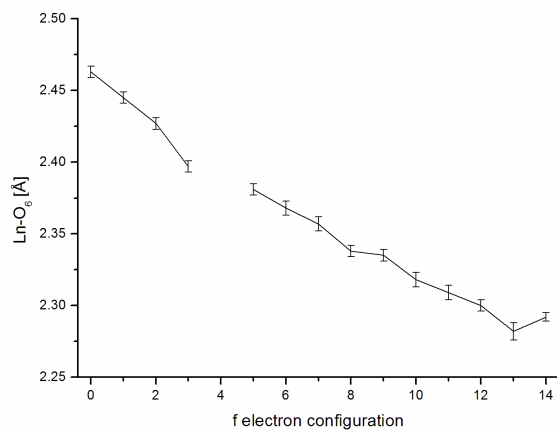

Figure S4. Bond length Ln-O6 vs. f electronic configuration.

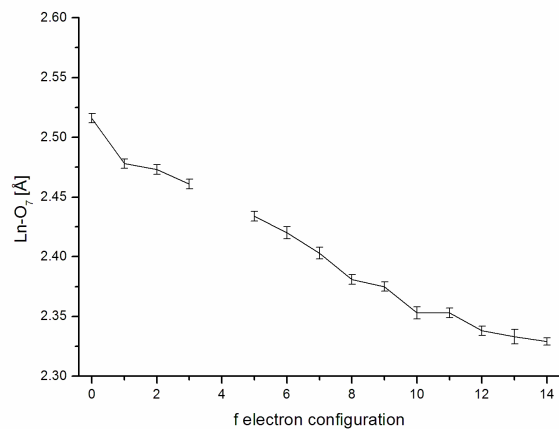

Figure S5. Bond length Ln-O7 vs. f electronic configuration.

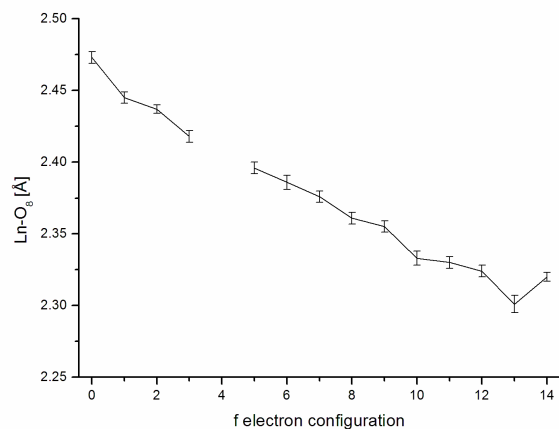

Figure S6. Bond length Ln-O8 vs. f electronic configuration.

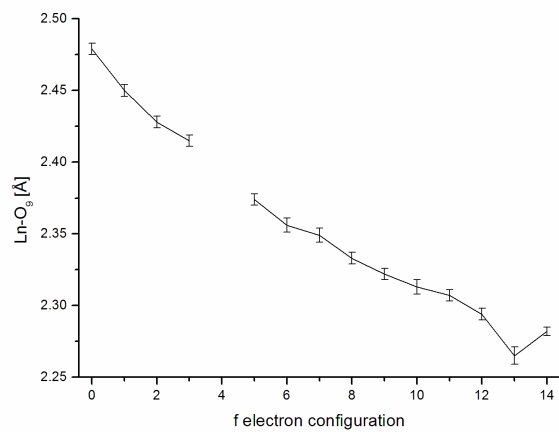

Figure S7. Bond length Ln-O9 vs. f electronic configuration.

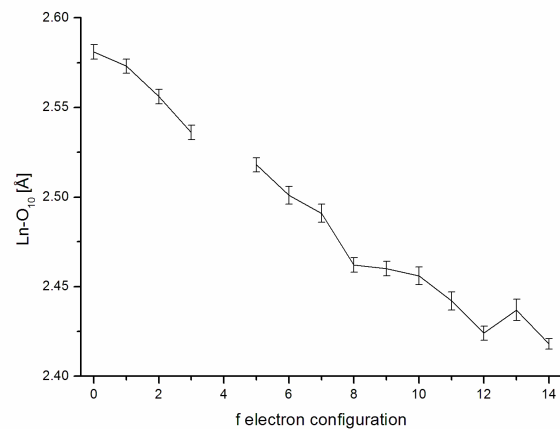

Figure S8. Bond length Ln-O10 vs. f electronic configuration.

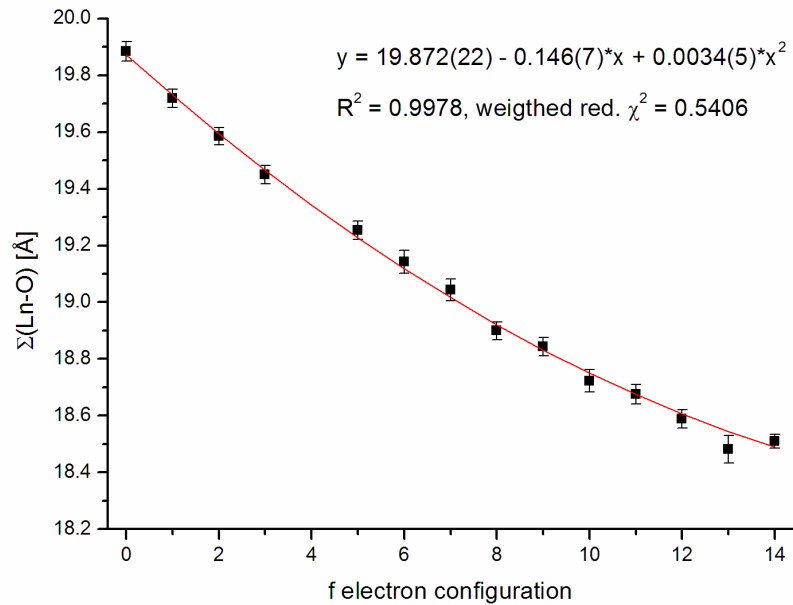

Figure S9. Sum of bond lengths Ln-O vs. f electronic configuration. Quadratic fit ( $\chi^2$ -weighting factor:  $su^{-2}$ ).

Distances O-O:

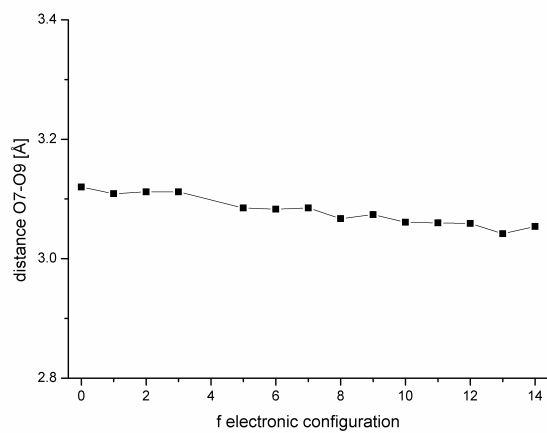

Figure S10. Distance O7-O9 vs. f electronic configuration.

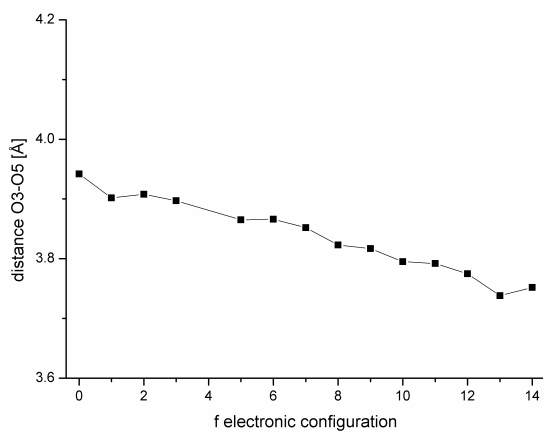

Figure S11. Distance O3-O5 vs. f electronic configuration.

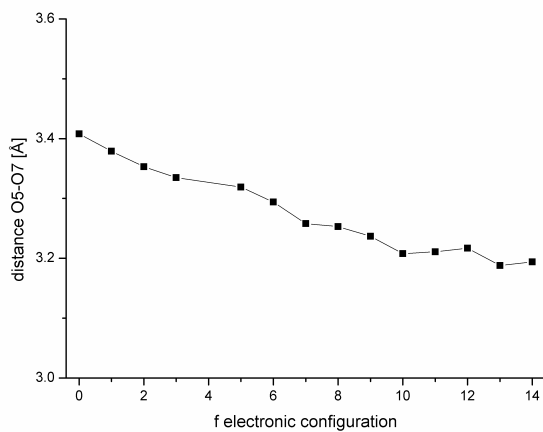

Figure S12. Distance O7-O5 vs. f electronic configuration.

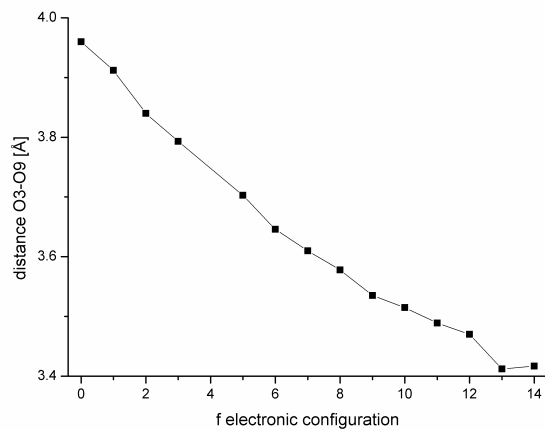

Figure S13. Distance O3-O9 vs. f electronic configuration.

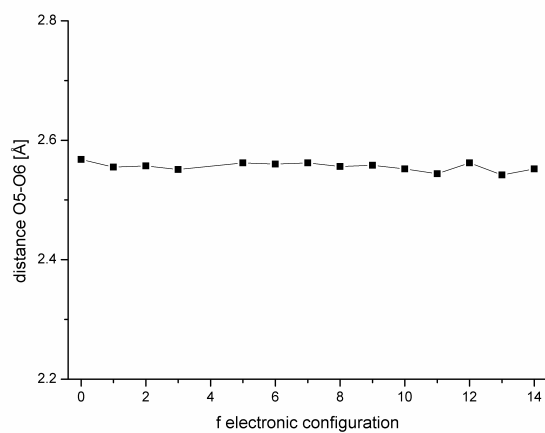

Figure S14. Distance O5-O6 vs. f electronic configuration.

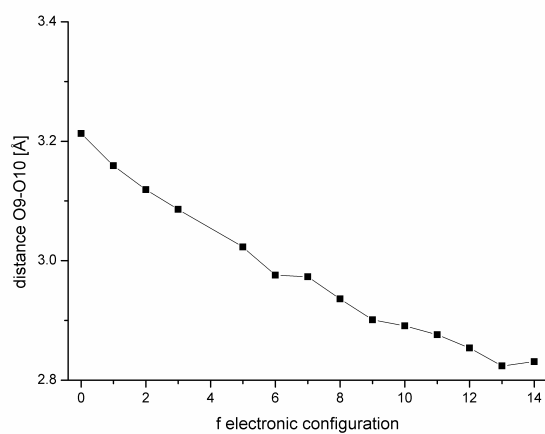

Figure S15. Distance O9-O10 vs. f electronic configuration.



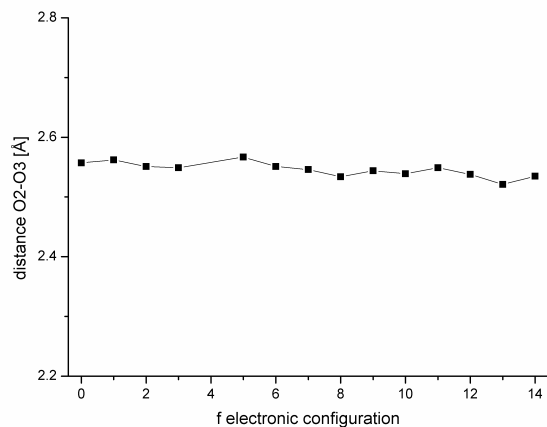

Figure S16. Distance O2-O3 vs. f electronic configuration.

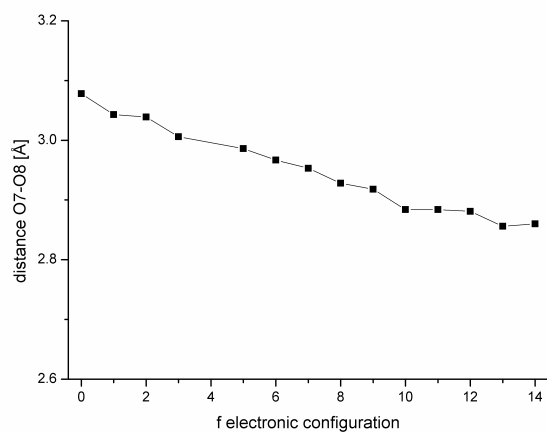

Figure S17. Distance O7-O8 vs. f electronic configuration.

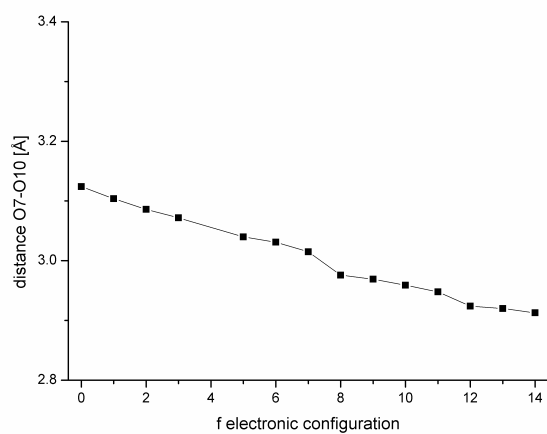

Figure S18. Distance O7-O10 vs. f electronic configuration.

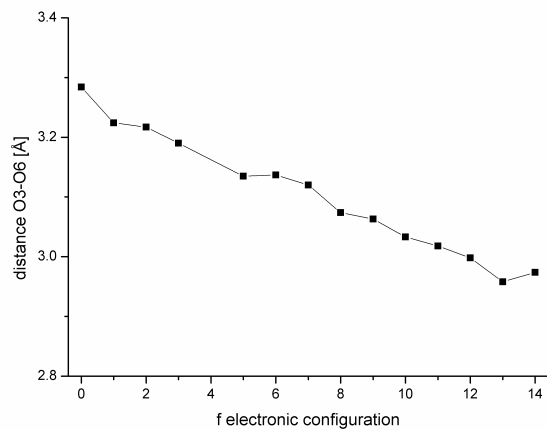

Figure S19. Distance O3-O6 vs. f electronic configuration.

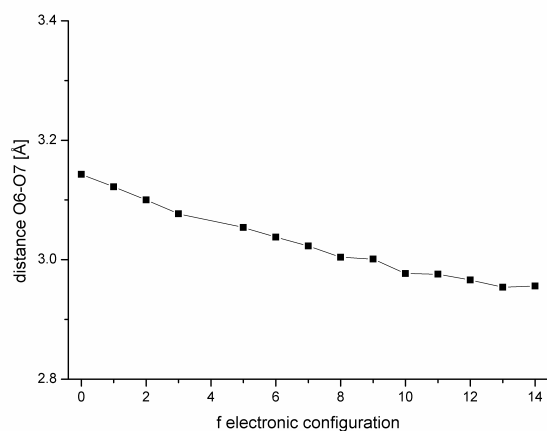

Figure S20. Distance O7-O6 vs. f electronic configuration.

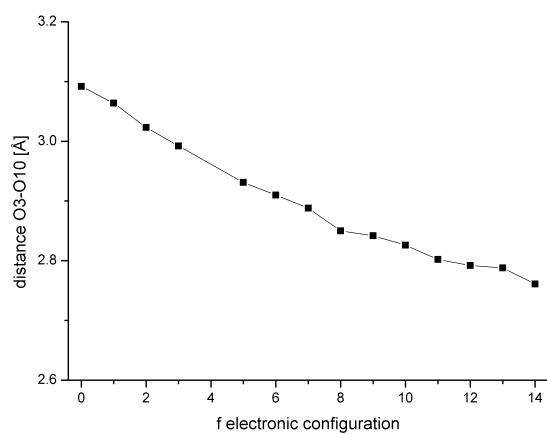

Figure S21. Distance O10-O3 vs. f electronic configuration.

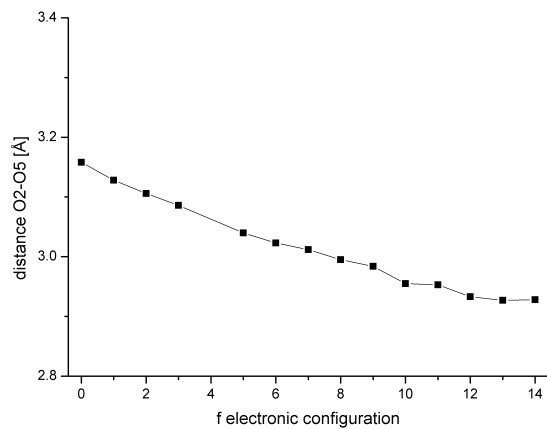

Figure S22. Distance O2-O5 vs. f electronic configuration.

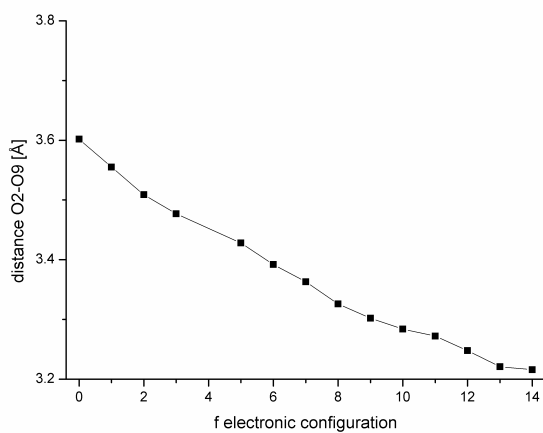

Figure S23. Distance O2-O9 vs. f electronic configuration.

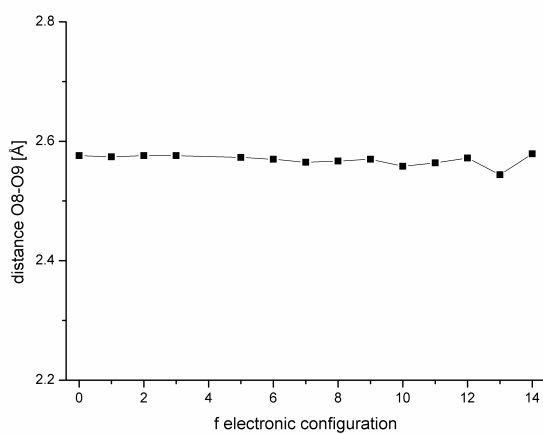

Figure S24. Distance O8-O9 vs. f electronic configuration.

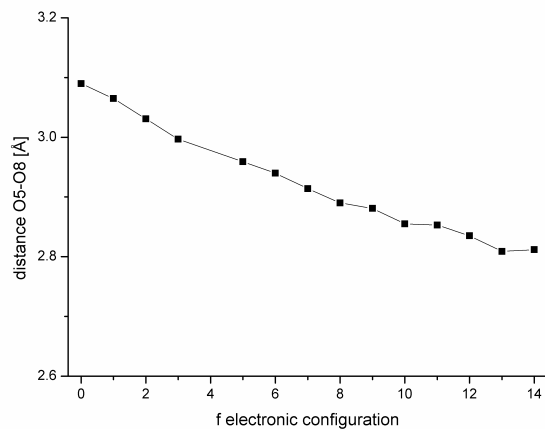

Figure S25. Distance O8-O5 vs. f electronic configuration.

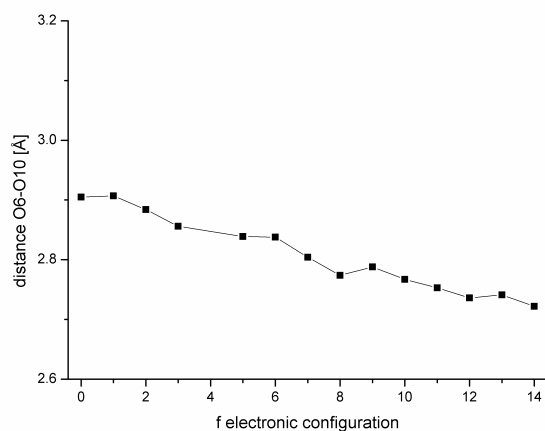

Figure S26. Distance O6-O10 vs. f electronic configuration.

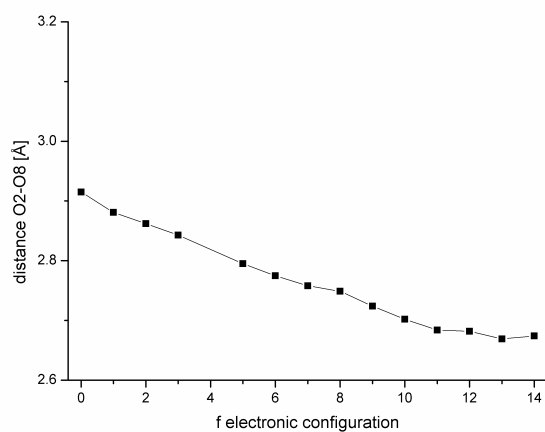

Figure S27. Distance O2-O8 vs. f electronic configuration.

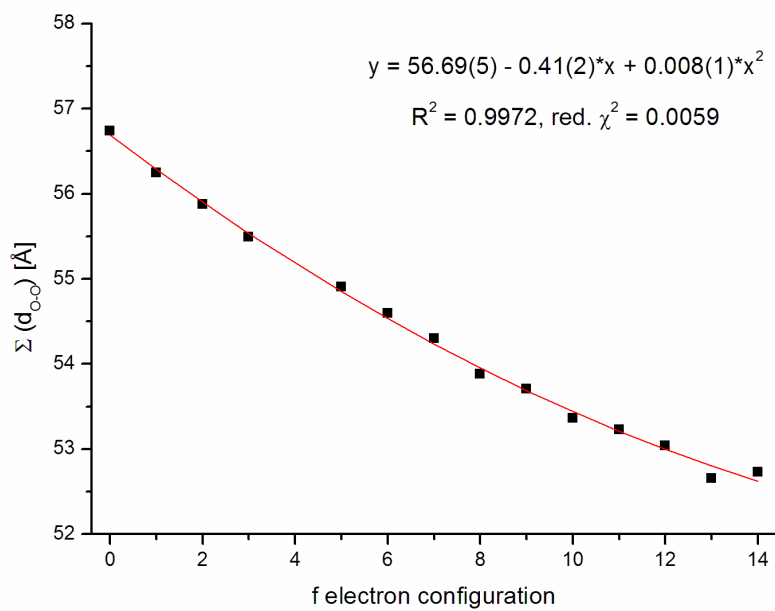

Figure S28. Sum of distance O-O vs. f electronic configuration. Quadratic fit.

## 2. TREN-SAL Lanthanide Complexes<sup>4-7</sup>

### 2.1 Structure

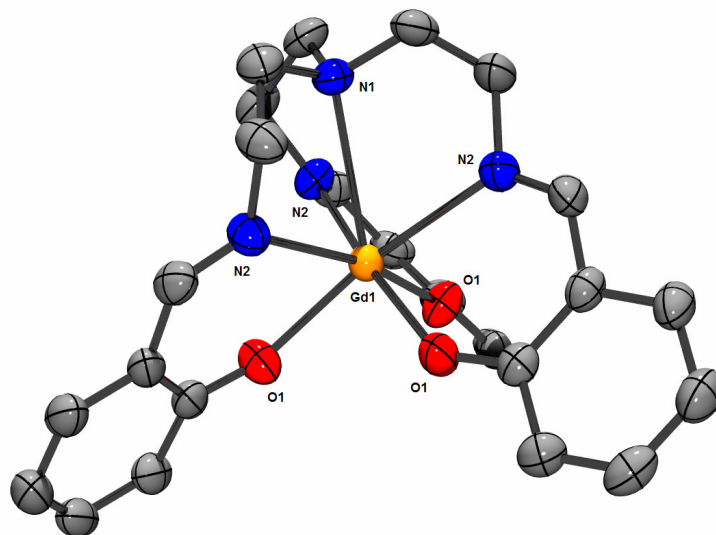

Asymmetric unit of [Gd(TREN-SAL)].<sup>4</sup> Thermal ellipsoid plot (Ortep 3 for Windows,<sup>1</sup> 50% probability level) with atom numbering scheme. Hydrogens omitted for clarity.

### 2.2 Bond Lengths

Table S4. Bond lengths in TREN-SAL lanthanide complexes.<sup>4-7</sup>

| f electrons (Ln)                  | d <sub>Ln-N1</sub> (su) [Å] (1x) | d <sub>Ln-N2</sub> (su) [Å] (3x) | d <sub>Ln-O1</sub> (su) [Å] (3x) | Σd <sub>Ln-X</sub> (su) [Å] |
|-----------------------------------|----------------------------------|----------------------------------|----------------------------------|-----------------------------|
| 0 (La)                            | -                                | -                                | -                                | -                           |
| 1 (Ce) <sup>4</sup>               | 2.834(4)                         | 2.605(3)                         | 2.288(3)                         | 17.513(22)                  |
| 2 (Pr) <sup>4</sup>               | 2.814(6)                         | 2.577(5)                         | 2.282(5)                         | 17.391(36)                  |
| 3 (Nd) <sup>4</sup>               | 2.796(5)                         | 2.573(4)                         | 2.273(3)                         | 17.334(26)                  |
| 4 (Pm)                            | -                                | -                                | -                                | -                           |
| 5 (Sm) <sup>5</sup>               | 2.773(4)                         | 2.531(3)                         | 2.247(3)                         | 17.107(22)                  |
| 6 (Eu) <sup>5</sup>               | 2.761(9)                         | 2.535(7)                         | 2.233(6)                         | 17.065(48)                  |
| 7 (Gd) <sup>4</sup>               | 2.746(4)                         | 2.511(3)                         | 2.232(2)                         | 16.975(19)                  |
| 8 (Tb) <sup>5</sup>               | 2.732(7)                         | 2.489(5)                         | 2.214(4)                         | 16.841(34)                  |
| 9 (Dy) <sup>6</sup>               | 2.738(6)                         | 2.480(4)                         | 2.201(4)                         | 16.781(30)                  |
| 10 (Ho) <sup>6</sup>              | 2.703(9)                         | 2.472(5)                         | 2.193(6)                         | 16.698(42)                  |
| 11 (Er) <sup>7</sup>              | 2.716(8)                         | 2.455(6)                         | 2.188(5)                         | 16.645(41)                  |
| 12 (Tm) <sup>7</sup>              | 2.713(8)                         | 2.449(6)                         | 2.167(5)                         | 16.561(41)                  |
| 13 (Yb) <sup>4</sup>              | 2.694(10)                        | 2.430(7)                         | 2.160(6)                         | 16.464(49)                  |
| 14 (Lu) <sup>7</sup>              | 2.722(8)                         | 2.426(6)                         | 2.162(5)                         | 16.486(41)                  |
| d <sub>Ce</sub> / d <sub>Lu</sub> | 1.041                            | 1.074                            | 1.058                            | 1.062                       |

## 2.3 X-X Distances

Table S5. X-X Distances in TREN-SAL lanthanide complexes.<sup>4-7</sup>

| f electrons (Ln)                  | d <sub>N1-N2</sub> [Å] (3x) | d <sub>N2-N2'</sub> [Å] (3x) | d <sub>N2-O1</sub> [Å] (3x) | d <sub>N2-O1'</sub> [Å] (3x) | d <sub>O1-O1'</sub> [Å] (3x) | Σd <sub>X-X</sub> [Å] |
|-----------------------------------|-----------------------------|------------------------------|-----------------------------|------------------------------|------------------------------|-----------------------|
| 0 (La)                            | -                           | -                            | -                           | -                            | -                            | -                     |
| 1 (Ce) <sup>4</sup>               | 2.909                       | 4.073                        | 2.833                       | 3.424                        | 3.481                        | 50.160                |
| 2 (Pr) <sup>4</sup>               | 2.900                       | 4.042                        | 2.821                       | 3.394                        | 3.454                        | 49.833                |
| 3 (Nd) <sup>4</sup>               | 2.908                       | 4.055                        | 2.819                       | 3.374                        | 3.425                        | 49.743                |
| 4 (Pm)                            | -                           | -                            | -                           | -                            | -                            | -                     |
| 5 (Sm) <sup>5</sup>               | 2.881                       | 3.994                        | 2.826                       | 3.295                        | 3.364                        | 49.080                |
| 6 (Eu) <sup>5</sup>               | 2.874                       | 3.997                        | 2.843                       | 3.272                        | 3.335                        | 48.963                |
| 7 (Gd) <sup>4</sup>               | 2.871                       | 3.973                        | 2.826                       | 3.273                        | 3.305                        | 48.744                |
| 8 (Tb) <sup>5</sup>               | 2.856                       | 3.943                        | 2.813                       | 3.219                        | 3.285                        | 48.348                |
| 9 (Dy) <sup>6</sup>               | 2.858                       | 3.931                        | 2.813                       | 3.202                        | 3.254                        | 48.174                |
| 10 (Ho) <sup>6</sup>              | 2.840                       | 3.923                        | 2.819                       | 3.187                        | 3.223                        | 47.976                |
| 11 (Er)*                          | -                           | -                            | -                           | -                            | -                            | -                     |
| 12 (Tm)*                          | -                           | -                            | -                           | -                            | -                            | -                     |
| 13 (Yb) <sup>4</sup>              | 2.836                       | 3.873                        | 2.794                       | 3.102                        | 3.163                        | 47.304                |
| 14 (Lu)*                          | -                           | -                            | -                           | -                            | -                            | -                     |
| d <sub>Ce</sub> / d <sub>Lu</sub> | 1.026                       | 1.052                        | 1.014                       | 1.104                        | 1.101                        | 1.060                 |

\* Coordinates were not available for the calculation of X-X distances.

## 2.4 Trends in Bond Lengths and X-X Distances vs. f Electron Configuration

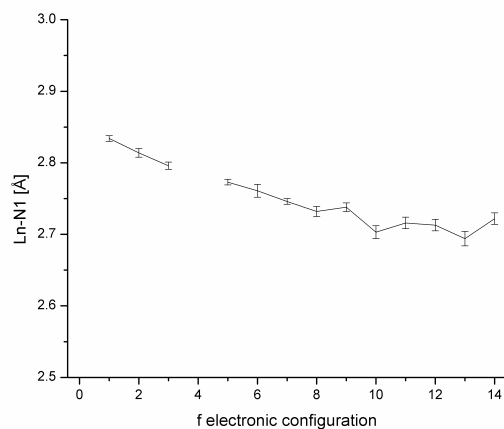

Figure S29. Bond length Ln-N1 vs. f electronic configuration.

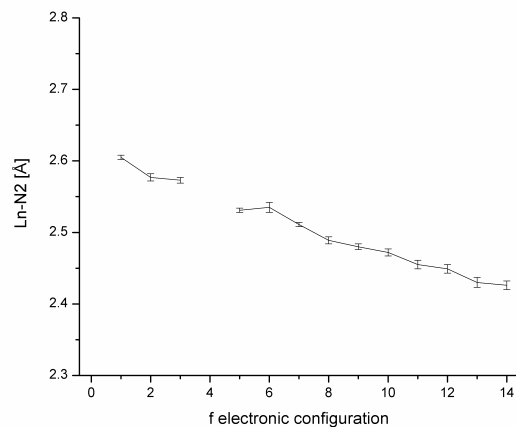

Figure S30. Bond length Ln-N2 vs. f electronic configuration.

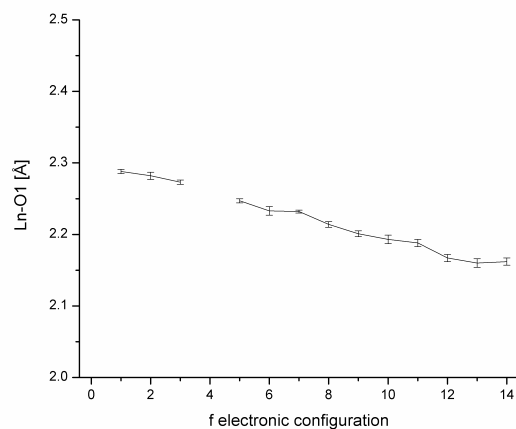

Figure S31. Bond length Ln-O1 vs. f electronic configuration.

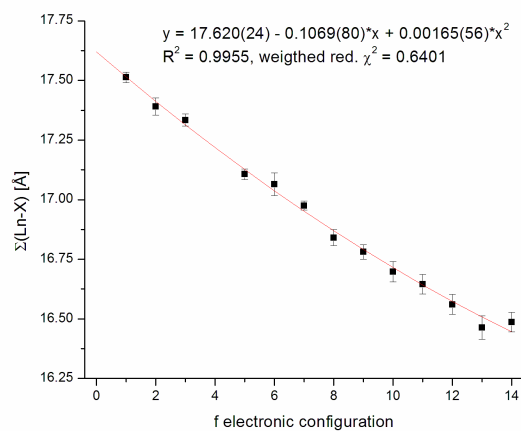

Figure S32. Sum of bond lengths Ln-X (X = N, O) vs. f electronic configuration. Quadratic fit ( $\chi^2$ - weighting factor:  $\text{su}^{-2}$ ).



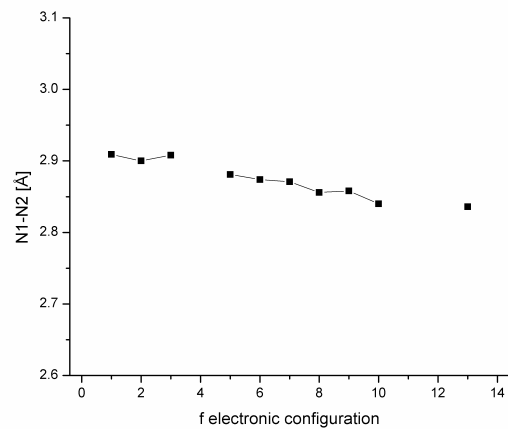

Figure S33. Distance N1-N2 vs. f electronic configuration.

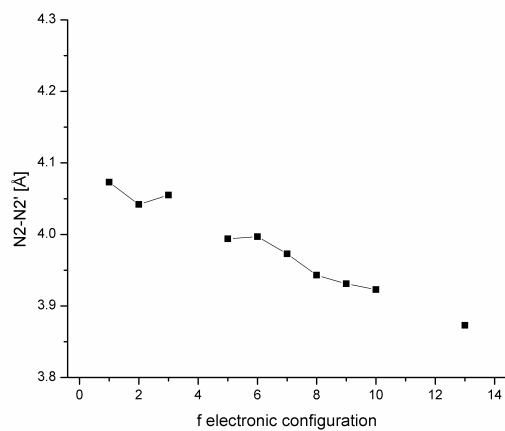

Figure S34. Distance N2-N2' vs. f electronic configuration.

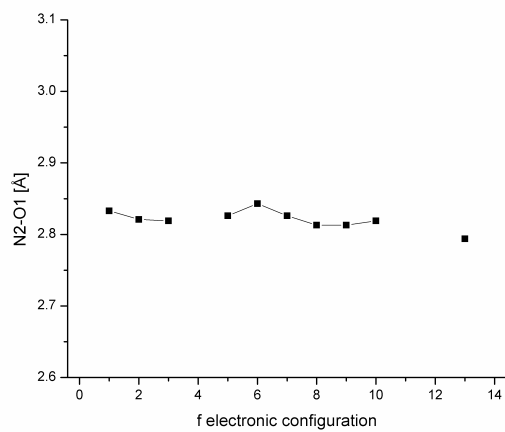

Figure S35. Distance N2-O1 vs. f electronic configuration.

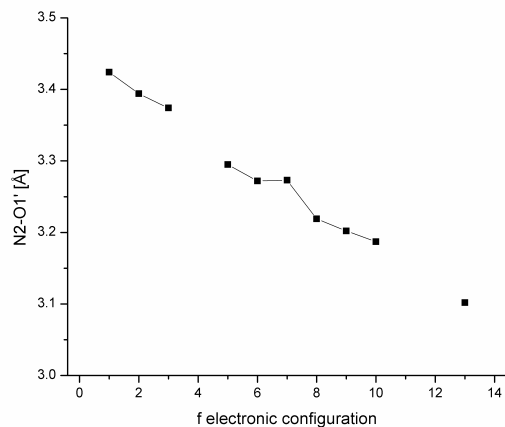

Figure S36. Distance N2-O1' vs. f electronic configuration.

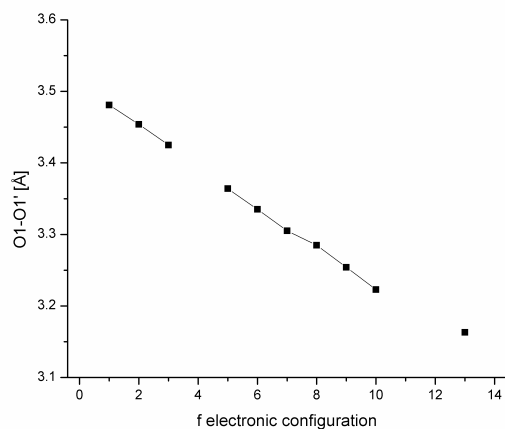

Figure S37. Distance O1-O1' vs. f electronic configuration.

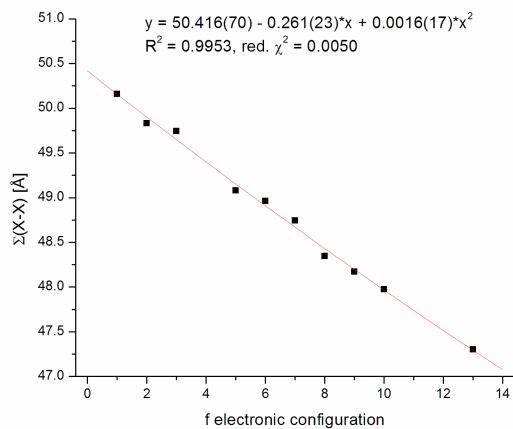

Figure S38. Sum of Distances X-X (X = N, O; bound to Ln) vs. f electronic configuration. Quadratic fit.

### 3. [Ln(tpzt)(NO<sub>3</sub>)<sub>3</sub>(H<sub>2</sub>O)] Complexes<sup>8</sup>

#### 3.1 Structure

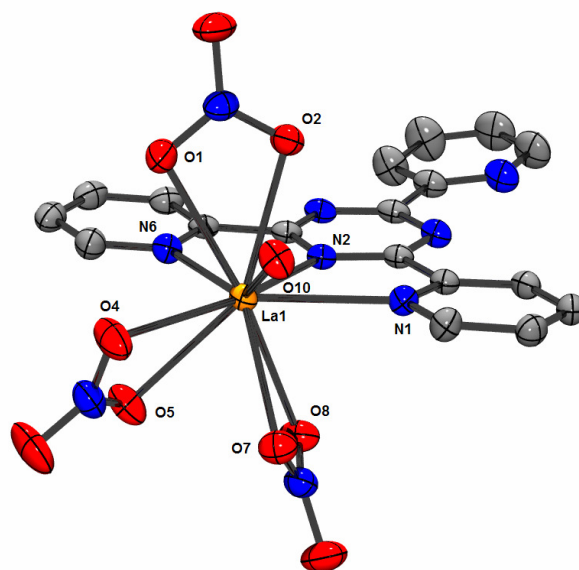

Asymmetric unit of [La(tpzt)(NO<sub>3</sub>)<sub>3</sub>(H<sub>2</sub>O)]\*2EtOH.<sup>8</sup> Thermal ellipsoid plot (Ortep 3 for Windows,<sup>1</sup> 50% probability level) with atom numbering scheme. Hydrogens and the two isolated ethanol molecules omitted for clarity.

#### 3.2 Bond Lengths

Table S6. Bond lengths in [Ln(tpzt)(NO<sub>3</sub>)<sub>3</sub>(H<sub>2</sub>O)].<sup>8</sup>

| f electrons<br>(Ln)               | d <sub>Ln-N1</sub> (su)<br>[Å] | d <sub>Ln-N2</sub> (su)<br>[Å] | d <sub>Ln-N6</sub> (su)<br>[Å] | d <sub>Ln-O1</sub> (su)<br>[Å] | d <sub>Ln-O2</sub> (su)<br>[Å] | d <sub>Ln-O4</sub> (su)<br>[Å] | d <sub>Ln-O5</sub> (su)<br>[Å] | d <sub>Ln-O7</sub> (su)<br>[Å] | d <sub>Ln-O8</sub> (su)<br>[Å] | d <sub>Ln-O10</sub> (su)<br>[Å] | Σd <sub>Ln-X</sub> (su)<br>[Å] |
|-----------------------------------|--------------------------------|--------------------------------|--------------------------------|--------------------------------|--------------------------------|--------------------------------|--------------------------------|--------------------------------|--------------------------------|---------------------------------|--------------------------------|
| 0 (La)                            | 2.667(2)                       | 2.691(1)                       | 2.703(1)                       | 2.617(1)                       | 2.570(1)                       | 2.588(2)                       | 2.631(1)                       | 2.595(1)                       | 2.631(1)                       | 2.452(1)                        | 26.145(12)                     |
| 1 (Ce)                            | 2.660(4)                       | 2.678(4)                       | 2.696(4)                       | 2.598(4)                       | 2.549(4)                       | 2.565(4)                       | 2.618(4)                       | 2.585(4)                       | 2.611(4)                       | 2.424(4)                        | 25.984(40)                     |
| 2 (Pr)                            | 2.630(3)                       | 2.644(3)                       | 2.668(3)                       | 2.583(3)                       | 2.524(3)                       | 2.546(3)                       | 2.594(3)                       | 2.556(2)                       | 2.592(3)                       | 2.412(3)                        | 25.749(29)                     |
| 3 (Nd)                            | 2.614(3)                       | 2.629(3)                       | 2.658(3)                       | 2.568(3)                       | 2.506(3)                       | 2.534(3)                       | 2.584(3)                       | 2.541(3)                       | 2.584(3)                       | 2.400(3)                        | 25.618(30)                     |
| 4 (Pm)                            | -                              | -                              | -                              | -                              | -                              | -                              | -                              | -                              | -                              | -                               | -                              |
| 5 (Sm)                            | 2.593(2)                       | 2.603(2)                       | 2.629(2)                       | 2.546(2)                       | 2.481(2)                       | 2.505(2)                       | 2.566(2)                       | 2.511(2)                       | 2.557(2)                       | 2.368(2)                        | 25.359(20)                     |
| 6 (Eu)                            | 2.576(2)                       | 2.579(2)                       | 2.619(2)                       | 2.536(2)                       | 2.465(2)                       | 2.490(2)                       | 2.558(2)                       | 2.496(2)                       | 2.544(2)                       | 2.349(2)                        | 25.212(20)                     |
| 7 (Gd)                            | 2.569(2)*                      | 2.567(2)*                      | 2.607(2)                       | 2.532(2)                       | 2.456(2)                       | 2.485(2)*                      | 2.555(2)                       | 2.481(2)*                      | 2.538(2)                       | 2.337(2)                        | 25.127(20)                     |
| 8 (Tb)                            | 2.555(2)*                      | 2.545(2)*                      | 2.592(2)                       | 2.523(2)*                      | 2.439(2)                       | 2.464(2)                       | 2.552(2)                       | 2.467(2)                       | 2.520(2)*                      | 2.322(2)                        | 24.979(20)                     |
| 9 (Dy)                            | 2.547(2)*                      | 2.534(2)*                      | 2.582(2)                       | 2.516(2)*                      | 2.426(2)                       | 2.451(2)                       | 2.545(2)                       | 2.453(2)                       | 2.515(2)*                      | 2.311(2)                        | 24.880(20)                     |
| 10 (Ho)                           | 2.537(2)*                      | 2.524(2)*                      | 2.573(2)                       | 2.512(2)*                      | 2.416(1)                       | 2.442(2)                       | 2.544(2)                       | 2.442(1)                       | 2.506(2)*                      | 2.303(2)                        | 24.799(18)                     |
| 11 (Er)                           | 2.528(2)*                      | 2.513(2)*                      | 2.562(3)                       | 2.503(3)*                      | 2.401(3)                       | 2.429(2)                       | 2.544(3)                       | 2.432(2)                       | 2.495(2)*                      | 2.292(3)                        | 24.699(25)                     |
| 12 (Tm)                           | 2.508(4)                       | 2.508(4)                       | 2.519(3)                       | 2.542(3)*                      | 2.404(3)                       | 2.419(3)                       | 2.520(3)*                      | 2.437(3)                       | 2.528(3)                       | 2.262(3)                        | 24.647(32)                     |
| 13 (Yb)                           | 2.510(2)*                      | 2.490(2)*                      | 2.541(2)                       | 2.504(2)*                      | 2.377(2)                       | 2.399(2)                       | 2.567(2)                       | 2.413(2)                       | 2.482(2)*                      | 2.270(2)                        | 24.553(20)                     |
| 14 (Lu)                           | -                              | -                              | -                              | -                              | -                              | -                              | -                              | -                              | -                              | -                               | -                              |
| d <sub>Ln</sub> / d <sub>Yb</sub> | 1.063                          | 1.081                          | 1.064                          | 1.080                          | 1.081                          | 1.079                          | 1.075                          | 1.045                          | 1.060                          | 1.025                           | 1.065                          |

\* Bond lengths taken from the published cif-files. Incorrectly listed in the original publication (see ref. 8).

### 3.3 X-X Distances

Table S7. Distances X-X (X = N,O bound to Ln) in  $[\text{Ln}(\text{tptz})(\text{NO}_3)_3(\text{H}_2\text{O})]^{8-}$ .

| f electrons<br>(Ln)           | $d_{\text{N1-N2}}$<br>[Å] | $d_{\text{N1-O2}}$<br>[Å] | $d_{\text{N1-O10}}$<br>[Å] | $d_{\text{N1-O7}}$<br>[Å] | $d_{\text{N1-O8}}$<br>[Å] | $d_{\text{N2-O2}}$<br>[Å] | $d_{\text{O2-O10}}$<br>[Å] | $d_{\text{O10-O7}}$<br>[Å] | $d_{\text{O7-O8}}$<br>[Å] | $d_{\text{O8-N2}}$<br>[Å] | $d_{\text{N6-O1}}$<br>[Å] | $d_{\text{O1-O4}}$<br>[Å] | $d_{\text{O4-O5}}$<br>[Å] | $d_{\text{O5-N6}}$<br>[Å] | $d_{\text{N2-N6}}$<br>[Å] | $d_{\text{O1-O2}}$<br>[Å] | $d_{\text{O1-O10}}$<br>[Å] | $d_{\text{O10-O4}}$<br>[Å] | $d_{\text{O4-O7}}$<br>[Å] | $d_{\text{O7-O5}}$<br>[Å] | $d_{\text{O5-O8}}$<br>[Å] | $\Sigma d_{\text{X-X}}$<br>[Å] |
|-------------------------------|---------------------------|---------------------------|----------------------------|---------------------------|---------------------------|---------------------------|----------------------------|----------------------------|---------------------------|---------------------------|---------------------------|---------------------------|---------------------------|---------------------------|---------------------------|---------------------------|----------------------------|----------------------------|---------------------------|---------------------------|---------------------------|--------------------------------|
| 0 (La)                        | 2.705                     | 3.175                     | 3.195                      | 3.246                     | 2.979                     | 2.918                     | 3.025                      | 3.115                      | 2.164                     | 3.145                     | 3.048                     | 3.042                     | 2.152                     | 3.089                     | 2.698                     | 2.159                     | 3.080                      | 3.042                      | 3.154                     | 3.028                     | 2.993                     | 61.152                         |
| 1 (Ce)                        | 2.715                     | 3.157                     | 3.176                      | 3.237                     | 2.967                     | 2.900                     | 3.002                      | 3.084                      | 2.165                     | 3.124                     | 3.045                     | 3.014                     | 2.161                     | 3.078                     | 2.700                     | 2.162                     | 3.039                      | 2.974                      | 3.100                     | 2.981                     | 2.949                     | 60.730                         |
| 2 (Pr)                        | 2.701                     | 3.141                     | 3.148                      | 3.179                     | 2.934                     | 2.871                     | 2.975                      | 3.060                      | 2.163                     | 3.080                     | 3.004                     | 2.974                     | 2.159                     | 3.041                     | 2.691                     | 2.161                     | 3.014                      | 2.959                      | 3.080                     | 2.950                     | 2.906                     | 60.191                         |
| 3 (Nd)                        | 2.702                     | 3.121                     | 3.128                      | 3.149                     | 2.918                     | 2.848                     | 2.971                      | 3.032                      | 2.170                     | 3.053                     | 2.994                     | 2.955                     | 2.162                     | 3.026                     | 2.687                     | 2.160                     | 2.993                      | 2.928                      | 3.057                     | 2.931                     | 2.889                     | 59.874                         |
| 4 (Pm)                        | -                         | -                         | -                          | -                         | -                         | -                         | -                          | -                          | -                         | -                         | -                         | -                         | -                         | -                         | -                         | -                         | -                          | -                          | -                         | -                         | -                         | -                              |
| 5 (Sm)                        | 2.703                     | 3.099                     | 3.087                      | 3.111                     | 2.902                     | 2.833                     | 2.928                      | 3.004                      | 2.168                     | 3.001                     | 2.945                     | 2.906                     | 2.155                     | 2.990                     | 2.677                     | 2.163                     | 2.958                      | 2.890                      | 3.017                     | 2.887                     | 2.842                     | 59.266                         |
| 6 (Eu)                        | 2.691                     | 3.089                     | 3.066                      | 3.083                     | 2.884                     | 2.816                     | 2.914                      | 2.974                      | 2.171                     | 2.968                     | 2.929                     | 2.886                     | 2.153                     | 2.964                     | 2.676                     | 2.150                     | 2.942                      | 2.869                      | 3.003                     | 2.876                     | 2.820                     | 58.924                         |
| 7 (Gd)                        | 2.692                     | 3.077                     | 3.056                      | 3.068                     | 2.874                     | 2.808                     | 2.895                      | 2.963                      | 2.163                     | 2.955                     | 2.914                     | 2.869                     | 2.157                     | 2.953                     | 2.667                     | 2.159                     | 2.925                      | 2.862                      | 2.993                     | 2.859                     | 2.806                     | 58.715                         |
| 8 (Tb)                        | 2.688                     | 3.065                     | 3.031                      | 3.043                     | 2.859                     | 2.789                     | 2.881                      | 2.945                      | 2.158                     | 2.920                     | 2.901                     | 2.846                     | 2.152                     | 2.936                     | 2.659                     | 2.153                     | 2.911                      | 2.838                      | 2.972                     | 2.840                     | 2.788                     | 58.375                         |
| 9 (Dy)                        | 2.690                     | 3.052                     | 3.019                      | 3.025                     | 2.850                     | 2.775                     | 2.868                      | 2.926                      | 2.162                     | 2.906                     | 2.881                     | 2.825                     | 2.149                     | 2.925                     | 2.656                     | 2.156                     | 2.900                      | 2.824                      | 2.958                     | 2.822                     | 2.770                     | 58.139                         |
| 10 (Ho)                       | 2.686                     | 3.036                     | 3.004                      | 3.009                     | 2.842                     | 2.763                     | 2.859                      | 2.911                      | 2.159                     | 2.889                     | 2.871                     | 2.816                     | 2.151                     | 2.909                     | 2.659                     | 2.156                     | 2.890                      | 2.818                      | 2.947                     | 2.813                     | 2.754                     | 57.942                         |
| 11 (Er)                       | 2.686                     | 3.026                     | 2.988                      | 2.993                     | 2.827                     | 2.748                     | 2.834                      | 2.906                      | 2.156                     | 2.873                     | 2.855                     | 2.800                     | 2.144                     | 2.899                     | 2.656                     | 2.156                     | 2.871                      | 2.814                      | 2.930                     | 2.801                     | 2.744                     | 57.707                         |
| 12 (Tm)                       | 2.647                     | 3.056                     | 3.015                      | 2.980                     | 2.797                     | 2.767                     | 2.836                      | 2.913                      | 2.167                     | 2.860                     | 2.853                     | 2.803                     | 2.159                     | 2.899                     | 2.631                     | 2.151                     | 2.851                      | 2.748                      | 2.938                     | 2.753                     | 2.731                     | 57.555                         |
| 13 (Yb)                       | 2.677                     | 3.007                     | 2.974                      | 2.977                     | 2.826                     | 2.729                     | 2.825                      | 2.876                      | 2.162                     | 2.836                     | 2.842                     | 2.776                     | 2.141                     | 2.888                     | 2.642                     | 2.148                     | 2.861                      | 2.788                      | 2.906                     | 2.785                     | 2.719                     | 57.385                         |
| 14 (Lu)                       | -                         | -                         | -                          | -                         | -                         | -                         | -                          | -                          | -                         | -                         | -                         | -                         | -                         | -                         | -                         | -                         | -                          | -                          | -                         | -                         | -                         | -                              |
| $d_{\text{N1}}/d_{\text{Nb}}$ | 1.010                     | 1.056                     | 1.074                      | 1.080                     | 1.054                     | 1.069                     | 1.071                      | 1.083                      | 1.001                     | 1.109                     | 1.072                     | 1.096                     | 1.005                     | 1.070                     | 1.021                     | 1.005                     | 1.077                      | 1.091                      | 1.085                     | 1.087                     | 1.101                     | 1.066                          |

### 3.4 Trends in Bond Lengths and X-X Distances vs. f Electron Configuration

Bond Lengths:

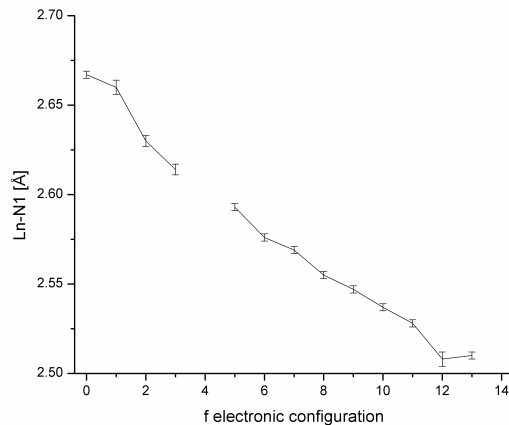

Figure S39. Bond length Ln-N1 vs. f electronic configuration.

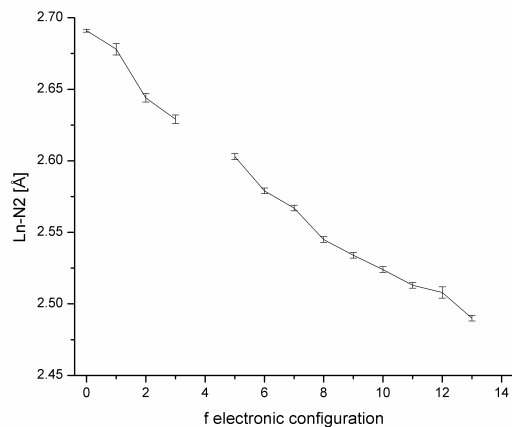

Figure S40. Bond length Ln-N2 vs. f electronic configuration.

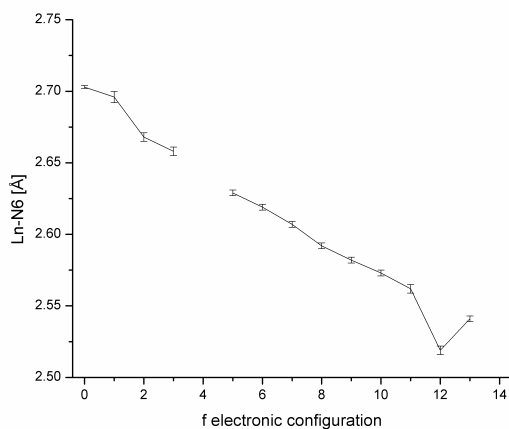

Figure S41. Bond length Ln-N6 vs. f electronic configuration.

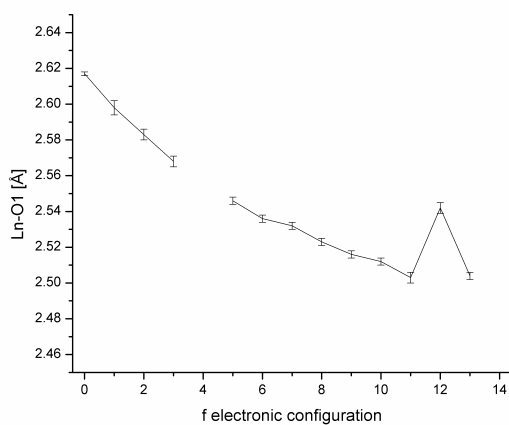

Figure S42. Bond length Ln-O1 vs. f electronic configuration.

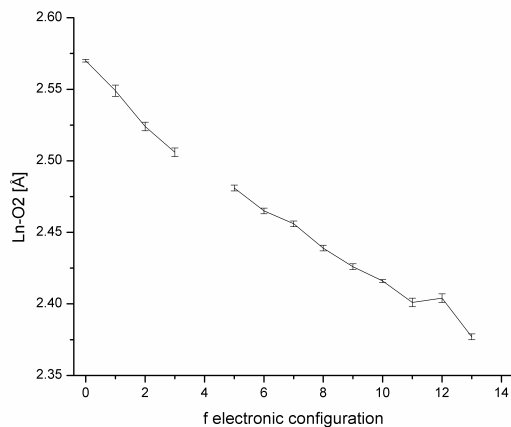

Figure S43. Bond length Ln-O2 vs. f electronic configuration.

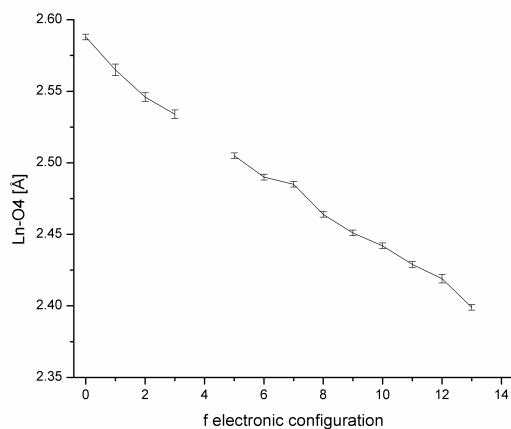

Figure S44. Bond length Ln-O4 vs. f electronic configuration.

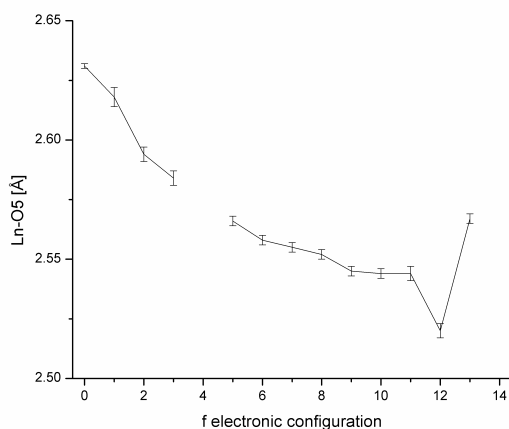

Figure S45. Bond length Ln-O5 vs. f electronic configuration.

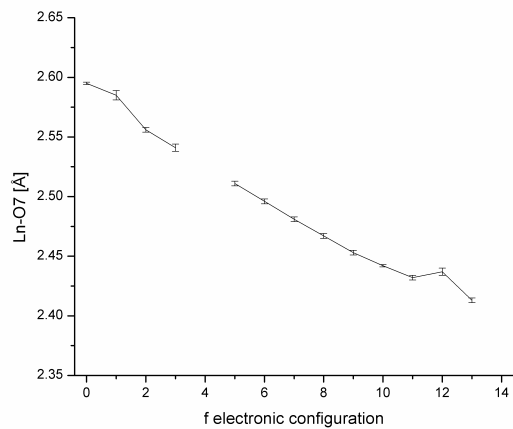

Figure S46. Bond length Ln-O7 vs. f electronic configuration.

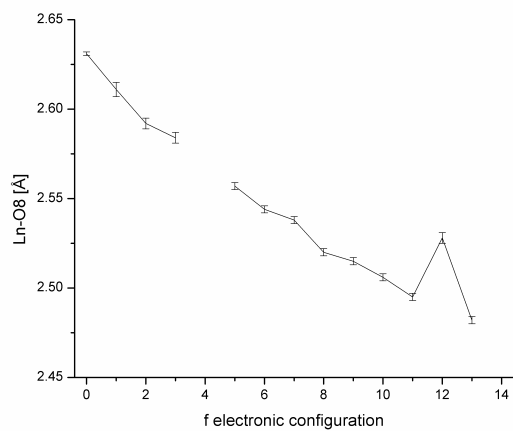

Figure S47. Bond length Ln-O8 vs. f electronic configuration.

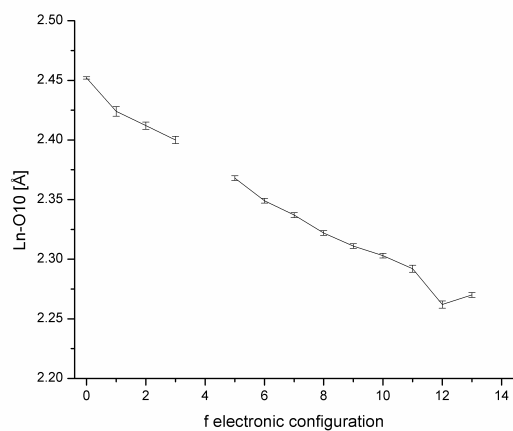

Figure S48. Bond length Ln-O10 vs. f electronic configuration.

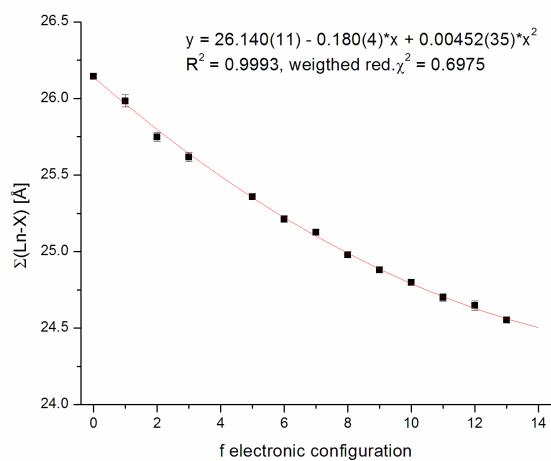

Figure S49. Sum of bond lengths Ln-X Ln-X (X = N, O) vs. f electronic configuration. Quadratic fit ( $\chi^2$ - weighting factor:  $\text{su}^{-2}$ ).

Distances X-X (X = N,O):

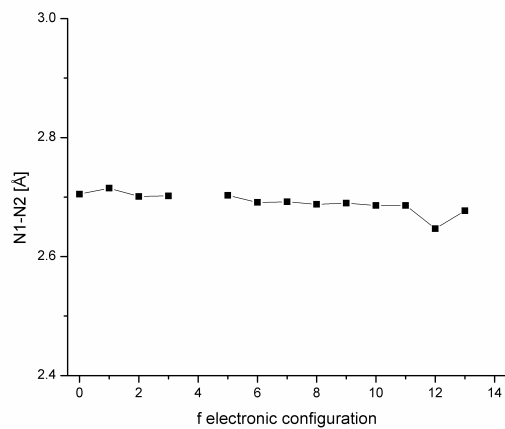

Figure S50. Distance N1-N2 vs. f electronic configuration.

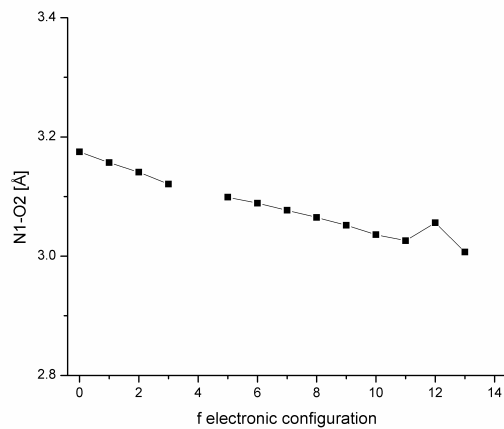

Figure S51. Distance N1-O2 vs. f electronic configuration.



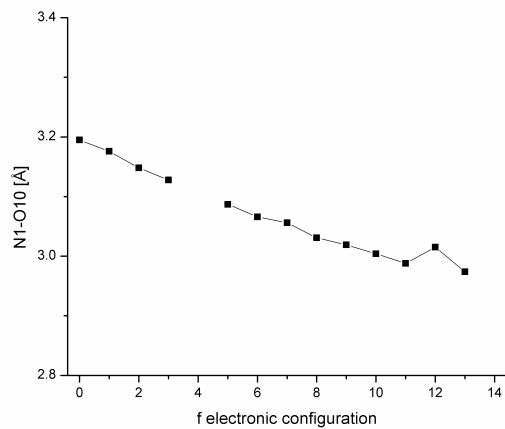

Figure S52. Distance N1-O10 vs. f electronic configuration.

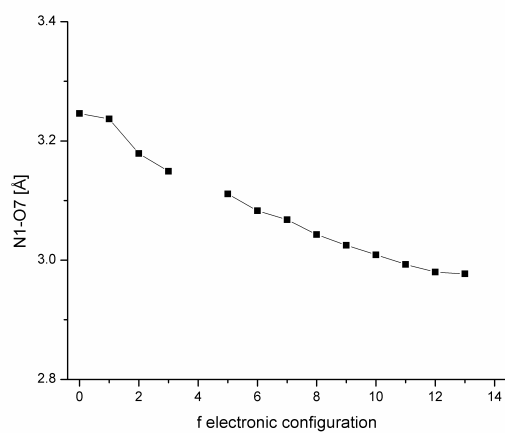

Figure S53. Distance N1-O7 vs. f electronic configuration.

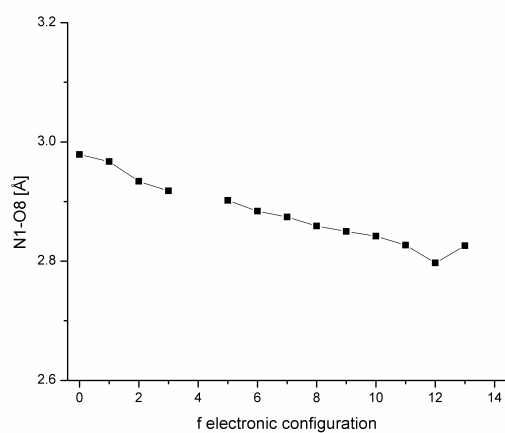

Figure S54. Distance N1-O8 vs. f electronic configuration.

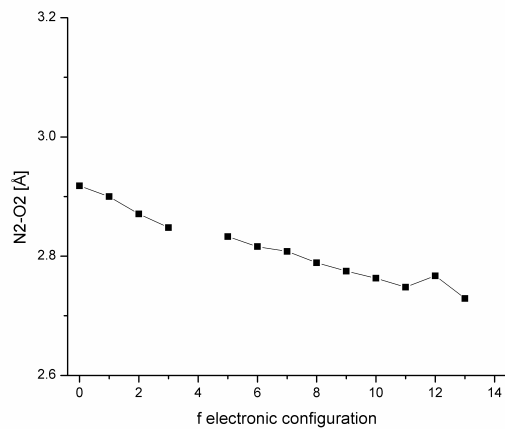

Figure S55. Distance N2-O2 vs. f electronic configuration.

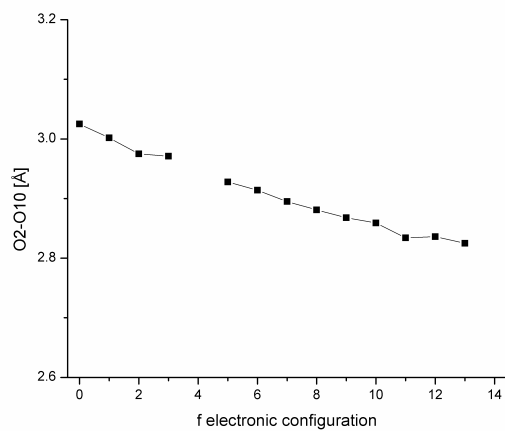

Figure S56. Distance O2-O10 vs. f electronic configuration.

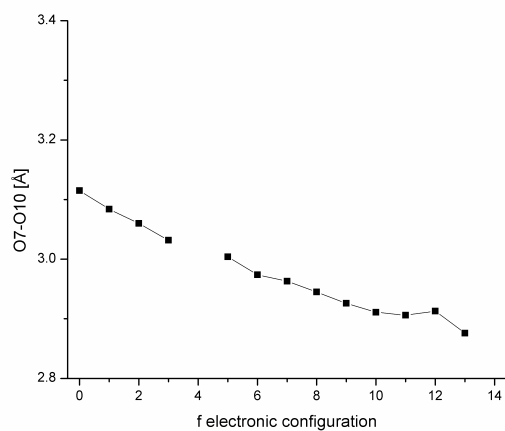

Figure S57. Distance O7-O10 vs. f electronic configuration.

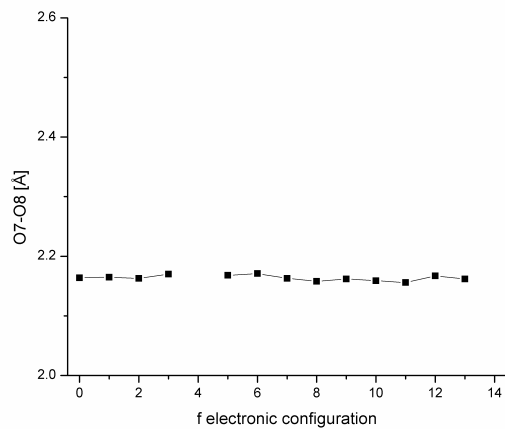

Figure S58. Distance O7-O8 vs. f electronic configuration.

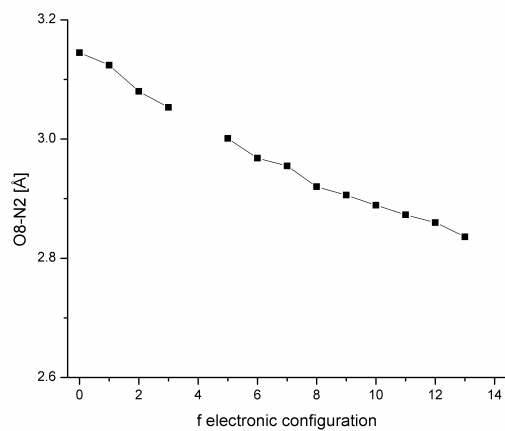

Figure S59. Distance O8-N2 vs. f electronic configuration.

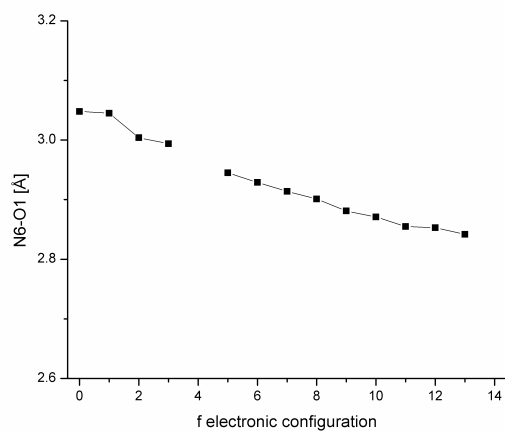

Figure S60. Distance N6-O1 vs. f electronic configuration.

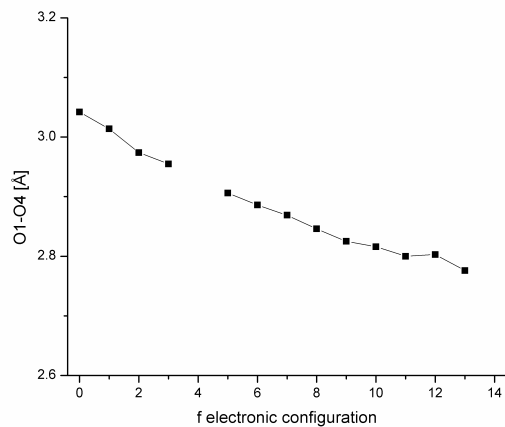

Figure S61. Distance O1-O4 vs. f electronic configuration.

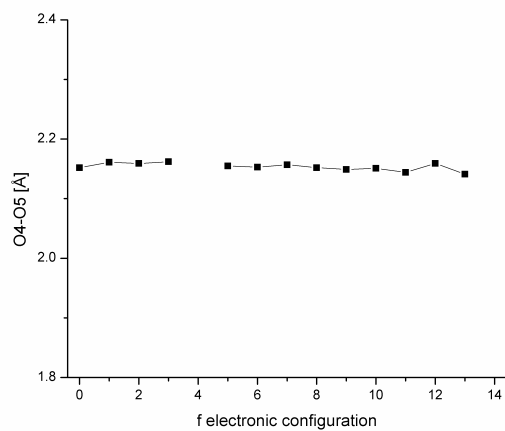

Figure S62. Distance O4-O5 vs. f electronic configuration.

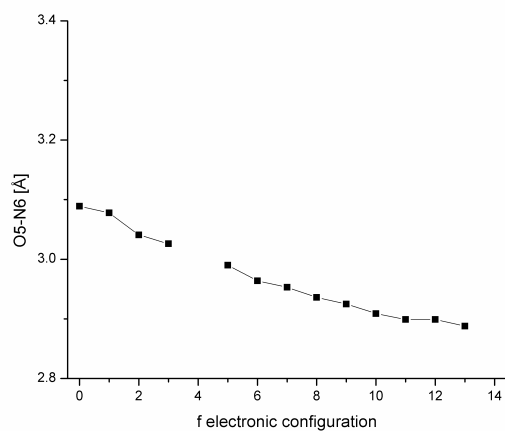

Figure S63. Distance O5-N6 vs. f electronic configuration.

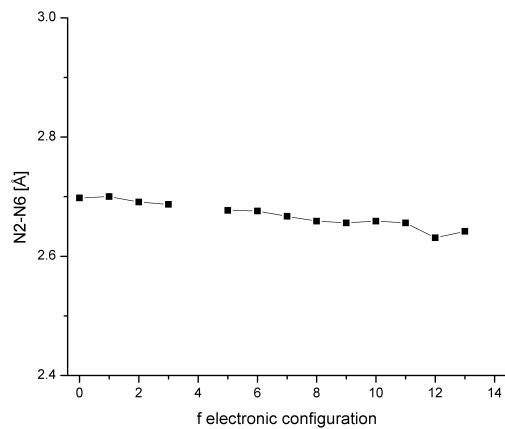

Figure S64. Distance N2-N6 vs. f electronic configuration.

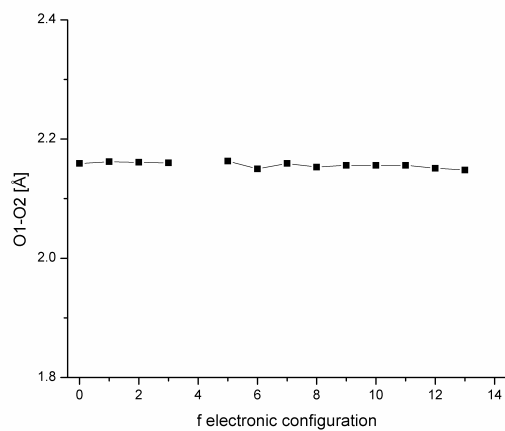

Figure S65. Distance O1-O2 vs. f electronic configuration.

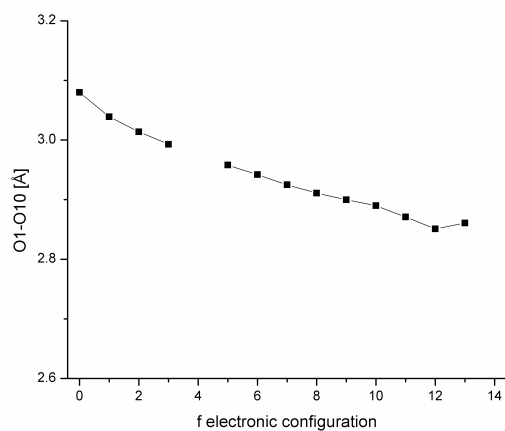

Figure S66. Distance O1-O10 vs. f electronic configuration.

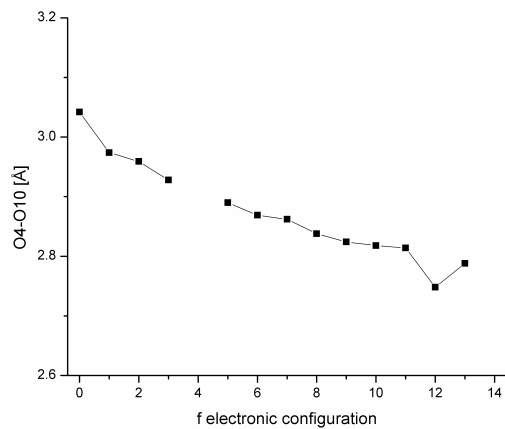

Figure S67. Distance O4-O10 vs. f electronic configuration.

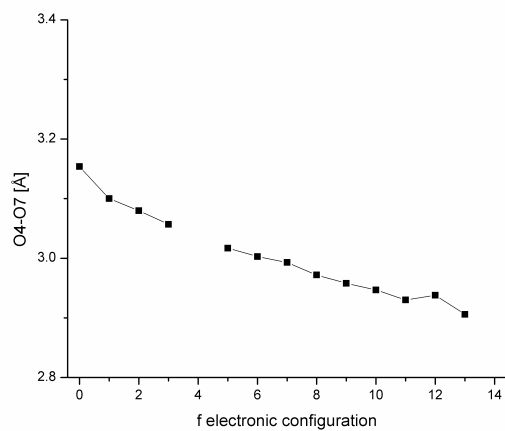

Figure S68. Distance O4-O7 vs. f electronic configuration.

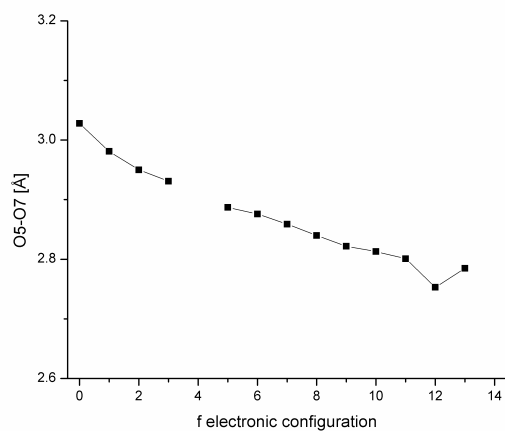

Figure S69. Distance O5-O7 vs. f electronic configuration.

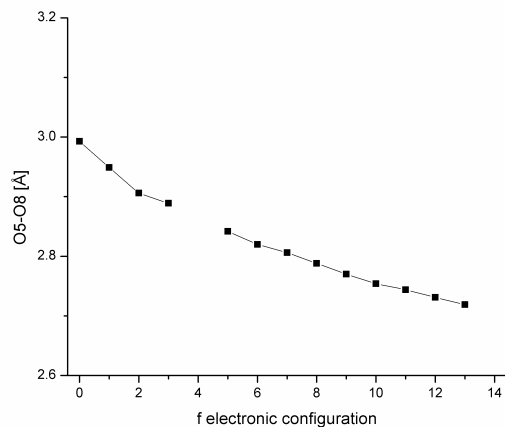

Figure S70. Distance O5-O8 vs. f electronic configuration.

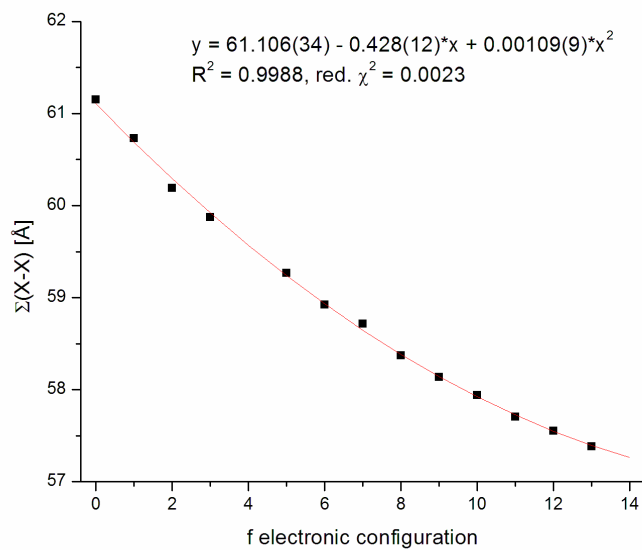

Figure S71. Sum of distance X-X (X = N, O) vs. f electronic configuration. Quadratic fit.

## 4. [Ln(PhMeCH-DOTAM)(H<sub>2</sub>O)] (OTf)<sub>3</sub> Complexes<sup>9-11</sup>

### 4.1 Structure

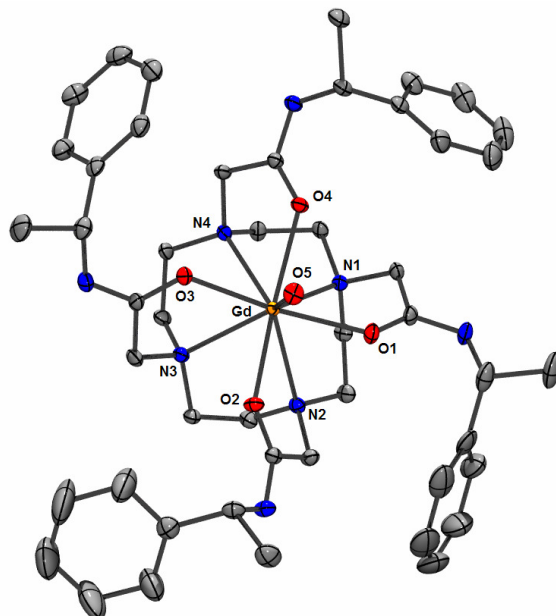

Asymmetric unit of [Ln(PhMeCH-DOTAM)(H<sub>2</sub>O)](OTf)<sub>3</sub> \* 3 H<sub>2</sub>O.<sup>9</sup> Thermal ellipsoid plot (Ortep 3 for Windows,<sup>1</sup> 50% probability level) with atom numbering scheme. Hydrogens, triflates, and the three isolated water molecules omitted for clarity.

### 4.2 Bond Lengths

Table S8. Bond lengths in [Ln(PhMeCH-DOTAM)(H<sub>2</sub>O)](OTf)<sub>3</sub> \* 3 H<sub>2</sub>O.<sup>9-11</sup>

| f electrons<br>(Ln)               | d <sub>Ln-O1</sub> (SU)<br>[Å] | d <sub>Ln-O2</sub> (SU)<br>[Å] | d <sub>Ln-O3</sub> (SU)<br>[Å] | d <sub>Ln-O4</sub> (SU)<br>[Å] | d <sub>Ln-O5</sub> (SU)<br>[Å] | d <sub>Ln-N1</sub> (SU)<br>[Å] | d <sub>Ln-N2</sub> (SU)<br>[Å] | d <sub>Ln-N3</sub> (SU)<br>[Å] | d <sub>Ln-N4</sub> (SU)<br>[Å] | Σd <sub>Ln-X</sub> (SU)<br>[Å] |
|-----------------------------------|--------------------------------|--------------------------------|--------------------------------|--------------------------------|--------------------------------|--------------------------------|--------------------------------|--------------------------------|--------------------------------|--------------------------------|
| 0 (La)                            | -                              | -                              | -                              | -                              | -                              | -                              | -                              | -                              | -                              | -                              |
| 1 (Ce)                            | -                              | -                              | -                              | -                              | -                              | -                              | -                              | -                              | -                              | -                              |
| 2 (Pr) <sup>9</sup>               | 2.428(2)                       | 2.403(2)                       | 2.434(2)                       | 2.415(2)                       | 2.516(2)                       | 2.696(2)                       | 2.738(2)                       | 2.708(2)                       | 2.746(2)                       | 23.084(18)                     |
| 3 (Nd) <sup>9</sup>               | 2.414(2)                       | 2.392(2)                       | 2.419(2)                       | 2.402(2)                       | 2.501(2)                       | 2.677(2)                       | 2.715(2)                       | 2.690(2)                       | 2.725(2)                       | 22.935(18)                     |
| 4 (Pm)                            | -                              | -                              | -                              | -                              | -                              | -                              | -                              | -                              | -                              | -                              |
| 5 (Sm) <sup>9</sup>               | 2.374(4)                       | 2.352(4)                       | 2.383(4)                       | 2.362(4)                       | 2.495(2)                       | 2.647(5)                       | 2.685(5)                       | 2.654(5)                       | 2.697(5)                       | 22.649(40)                     |
| 6 (Eu) <sup>9</sup>               | 2.377(2)                       | 2.355(2)                       | 2.379(2)                       | 2.361(2)                       | 2.482(2)                       | 2.643(2)                       | 2.680(2)                       | 2.655(2)                       | 2.689(2)                       | 22.621(18)                     |
| 7 (Gd) <sup>9</sup>               | 2.368(2)                       | 2.346(2)                       | 2.367(2)                       | 2.353(2)                       | 2.460(2)                       | 2.633(2)                       | 2.670(2)                       | 2.650(2)                       | 2.675(2)                       | 22.522(18)                     |
| 8 (Tb) <sup>10</sup>              | 2.355(2)                       | 2.333(2)*                      | 2.350(2)*                      | 2.331(2)                       | 2.461(3)                       | 2.624(3)                       | 2.664(3)*                      | 2.642(3)*                      | 2.669(3)                       | 22.429(23)                     |
| 9 (Dy) <sup>9</sup>               | 2.344(2)                       | 2.315(2)                       | 2.336(2)                       | 2.317(2)                       | 2.454(2)                       | 2.620(2)                       | 2.654(2)                       | 2.644(2)                       | 2.658(2)                       | 22.342(18)                     |
| 10 (Ho)                           | -                              | -                              | -                              | -                              | -                              | -                              | -                              | -                              | -                              | -                              |
| 11 (Er) <sup>10</sup>             | 2.321(1)                       | 2.296(2)                       | 2.310(1)                       | 2.294(2)                       | 2.432(2)                       | 2.605(2)                       | 2.639(2)                       | 2.629(2)                       | 2.636(2)                       | 22.162(15)                     |
| 12 (Tm)                           | -                              | -                              | -                              | -                              | -                              | -                              | -                              | -                              | -                              | -                              |
| 13 (Yb) <sup>11</sup>             | 2.298(2)*                      | 2.274(2)                       | 2.288(2)                       | 2.274(2)*                      | 2.440(2)                       | 2.598(2)                       | 2.636(2)                       | 2.626(2)                       | 2.630(3)                       | 22.064(19)                     |
| 14 (Lu) <sup>10</sup>             | 2.292(2)                       | 2.273(2)                       | 2.283(2)                       | 2.273(2)                       | 2.426(2)                       | 2.592(2)                       | 2.636(2)                       | 2.623(2)                       | 2.623(3)                       | 22.021(19)                     |
| d <sub>Pr</sub> / d <sub>Lu</sub> | 1.059                          | 1.057                          | 1.066                          | 1.062                          | 1.037                          | 1.040                          | 1.039                          | 1.032                          | 1.047                          | 1.048                          |

\* Bond lengths taken from the published cif-files. Incorrectly listed in the original publication (see ref. 10 and 11).



### 4.3 X-X Distances

Table S9. Distances X-X (X = N,O bound to Ln) in [Ln(PhMeCH-DOTAM)(H<sub>2</sub>O)](OTf)<sub>3</sub> \* 3 H<sub>2</sub>O.<sup>9-11</sup>

| f electrons<br>(Ln)               | d <sub>O5-O1</sub><br>[Å] | d <sub>O5-O2</sub><br>[Å] | d <sub>O5-O3</sub><br>[Å] | d <sub>O5-O4</sub><br>[Å] | d <sub>O1-O2</sub><br>[Å] | d <sub>O2-O3</sub><br>[Å] | d <sub>O3-O4</sub><br>[Å] | d <sub>O4-O1</sub><br>[Å] | d <sub>O1-N1</sub><br>[Å] | d <sub>O1-N2</sub><br>[Å] | d <sub>O2-N2</sub><br>[Å] | d <sub>O2-N3</sub><br>[Å] | d <sub>O3-N3</sub><br>[Å] | d <sub>O3-N4</sub><br>[Å] | d <sub>O4-N4</sub><br>[Å] | d <sub>O4-N1</sub><br>[Å] | d <sub>N1-N2</sub><br>[Å] | d <sub>N2-N3</sub><br>[Å] | d <sub>N3-N4</sub><br>[Å] | d <sub>N4-N1</sub><br>[Å] | Σd <sub>X-X</sub><br>[Å] |
|-----------------------------------|---------------------------|---------------------------|---------------------------|---------------------------|---------------------------|---------------------------|---------------------------|---------------------------|---------------------------|---------------------------|---------------------------|---------------------------|---------------------------|---------------------------|---------------------------|---------------------------|---------------------------|---------------------------|---------------------------|---------------------------|--------------------------|
| 0 (La)                            | -                         | -                         | -                         | -                         | -                         | -                         | -                         | -                         | -                         | -                         | -                         | -                         | -                         | -                         | -                         | -                         | -                         | -                         | -                         | -                         | -                        |
| 1 (Ce)                            | -                         | -                         | -                         | -                         | -                         | -                         | -                         | -                         | -                         | -                         | -                         | -                         | -                         | -                         | -                         | -                         | -                         | -                         | -                         | -                         | -                        |
| 2 (Pr) <sup>9</sup>               | 2.909                     | 2.984                     | 3.015                     | 2.989                     | 3.259                     | 3.310                     | 3.222                     | 3.372                     | 2.794                     | 3.086                     | 2.729                     | 3.037                     | 2.785                     | 3.096                     | 2.763                     | 3.114                     | 2.999                     | 3.019                     | 2.990                     | 3.025                     | 60.497                   |
| 3 (Nd) <sup>9</sup>               | 2.883                     | 2.955                     | 2.967                     | 2.953                     | 3.236                     | 3.276                     | 3.209                     | 3.337                     | 2.791                     | 3.067                     | 2.725                     | 3.018                     | 2.779                     | 3.082                     | 2.764                     | 3.087                     | 2.988                     | 3.009                     | 2.979                     | 3.013                     | 60.118                   |
| 4 (Pm)                            | -                         | -                         | -                         | -                         | -                         | -                         | -                         | -                         | -                         | -                         | -                         | -                         | -                         | -                         | -                         | -                         | -                         | -                         | -                         | -                         | -                        |
| 5 (Sm) <sup>9</sup>               | 2.831                     | 2.889                     | 2.913                     | 2.893                     | 3.171                     | 3.200                     | 3.136                     | 3.274                     | 2.776                     | 3.009                     | 2.713                     | 2.971                     | 2.766                     | 3.062                     | 2.751                     | 3.074                     | 2.962                     | 2.997                     | 2.975                     | 2.987                     | 59.350                   |
| 6 (Eu) <sup>9</sup>               | 2.814                     | 2.886                     | 2.891                     | 2.874                     | 3.171                     | 3.200                     | 3.140                     | 3.256                     | 2.779                     | 3.039                     | 2.722                     | 2.986                     | 2.769                     | 3.050                     | 2.752                     | 3.046                     | 2.972                     | 2.985                     | 2.964                     | 2.992                     | 59.288                   |
| 7 (Gd) <sup>9</sup>               | 2.793                     | 2.861                     | 2.858                     | 2.844                     | 3.154                     | 3.176                     | 3.133                     | 3.236                     | 2.776                     | 3.024                     | 2.724                     | 2.980                     | 2.770                     | 3.038                     | 2.751                     | 3.028                     | 2.965                     | 2.980                     | 2.953                     | 2.984                     | 59.028                   |
| 8 (Tb) <sup>10</sup>              | 2.781                     | 2.847                     | 2.838                     | 2.823                     | 3.129                     | 3.153                     | 3.101                     | 3.211                     | 2.770                     | 3.006                     | 2.720                     | 2.970                     | 2.767                     | 3.025                     | 2.745                     | 3.010                     | 2.962                     | 2.980                     | 2.950                     | 2.981                     | 58.769                   |
| 9 (Dy) <sup>9</sup>               | 2.758                     | 2.838                     | 2.822                     | 2.796                     | 3.116                     | 3.114                     | 3.093                     | 3.182                     | 2.765                     | 3.000                     | 2.716                     | 2.955                     | 2.761                     | 3.015                     | 2.736                     | 2.997                     | 2.954                     | 2.978                     | 2.953                     | 2.981                     | 58.530                   |
| 10 (Ho)                           | -                         | -                         | -                         | -                         | -                         | -                         | -                         | -                         | -                         | -                         | -                         | -                         | -                         | -                         | -                         | -                         | -                         | -                         | -                         | -                         | -                        |
| 11 (Er) <sup>10</sup>             | 2.729                     | 2.801                     | 2.768                     | 2.746                     | 3.077                     | 3.071                     | 3.063                     | 3.137                     | 2.759                     | 2.981                     | 2.716                     | 2.938                     | 2.751                     | 2.989                     | 2.732                     | 2.974                     | 2.943                     | 2.964                     | 2.940                     | 2.972                     | 58.051                   |
| 12 (Tm)                           | -                         | -                         | -                         | -                         | -                         | -                         | -                         | -                         | -                         | -                         | -                         | -                         | -                         | -                         | -                         | -                         | -                         | -                         | -                         | -                         | -                        |
| 13 (Yb) <sup>11</sup>             | 2.715                     | 2.797                     | 2.758                     | 2.727                     | 3.038                     | 3.035                     | 3.037                     | 3.111                     | 2.750                     | 2.959                     | 2.717                     | 2.926                     | 2.745                     | 2.972                     | 2.725                     | 2.956                     | 2.933                     | 2.963                     | 2.935                     | 2.974                     | 57.773                   |
| 14 (Lu) <sup>10</sup>             | 2.704                     | 2.777                     | 2.736                     | 2.710                     | 3.032                     | 3.022                     | 3.033                     | 3.101                     | 2.747                     | 2.954                     | 2.727                     | 2.921                     | 2.742                     | 2.963                     | 2.733                     | 2.953                     | 2.930                     | 2.966                     | 2.931                     | 2.974                     | 57.656                   |
| d <sub>Pt</sub> / d <sub>Lu</sub> | 1.076                     | 1.075                     | 1.102                     | 1.103                     | 1.075                     | 1.095                     | 1.062                     | 1.087                     | 1.017                     | 1.045                     | 1.001                     | 1.040                     | 1.016                     | 1.045                     | 1.011                     | 1.055                     | 1.024                     | 1.018                     | 1.020                     | 1.017                     | 1.049                    |

### 4.4 Trends in Bond Lengths and X-X Distances vs. f Electron Configuration

Bond Lengths:

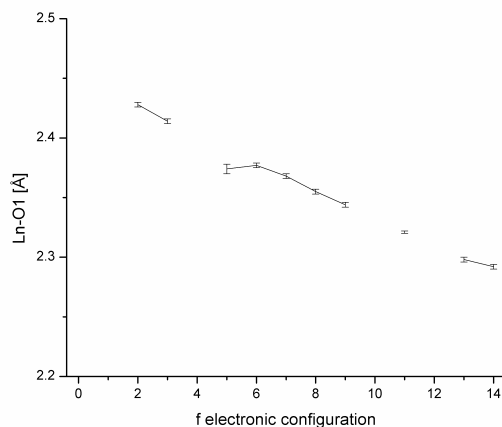

Figure S72. Bond length Ln-O1 vs. f electronic configuration.

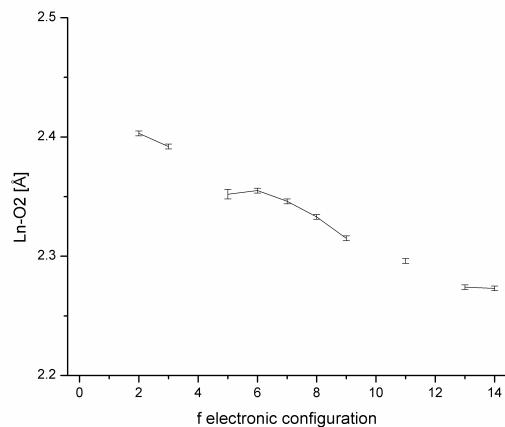

Figure S73. Bond length Ln-O2 vs. f electronic configuration.

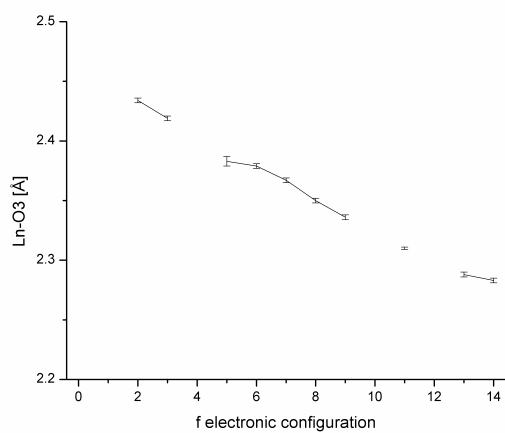

Figure S74. Bond length Ln-O3 vs. f electronic configuration.

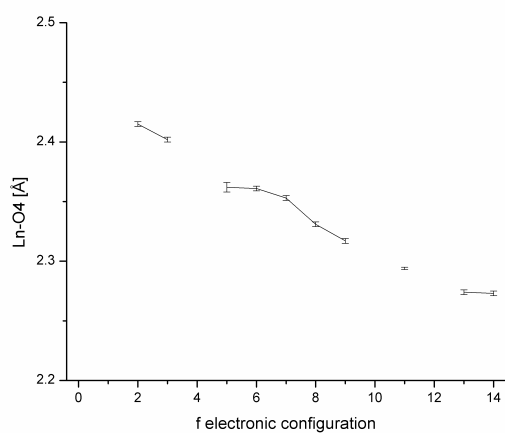

Figure S75. Bond length Ln-O4 vs. f electronic configuration.

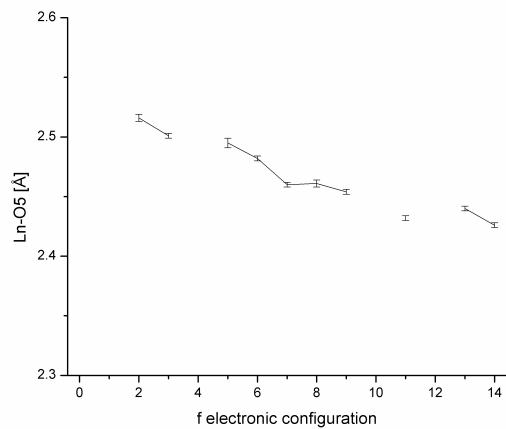

Figure S76. Bond length Ln-O5 vs. f electronic configuration.

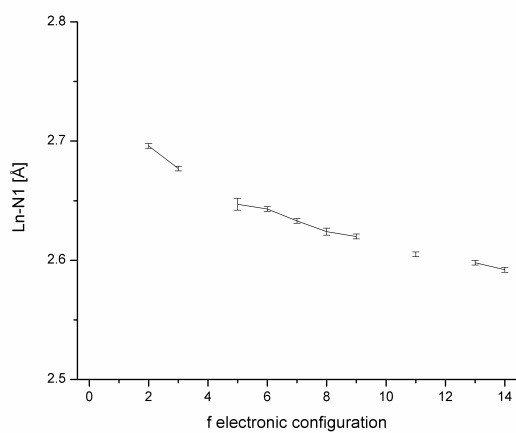

Figure S77. Bond length Ln-N1 vs. f electronic configuration.

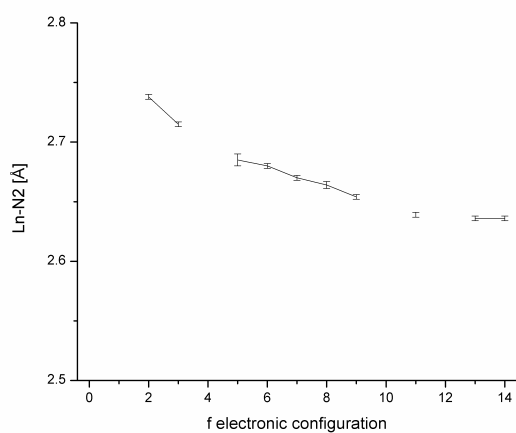

Figure S78. Bond length Ln-N2 vs. f electronic configuration.

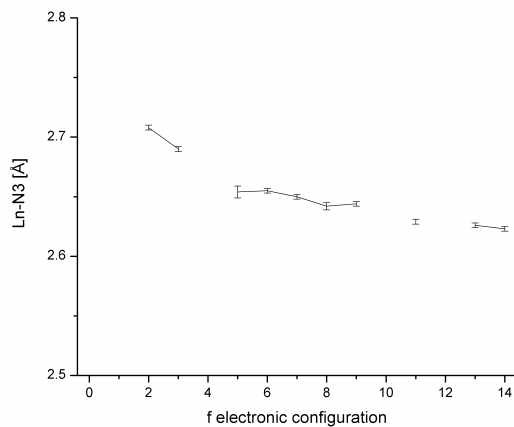

Figure S79. Bond length Ln-N3 vs. f electronic configuration.

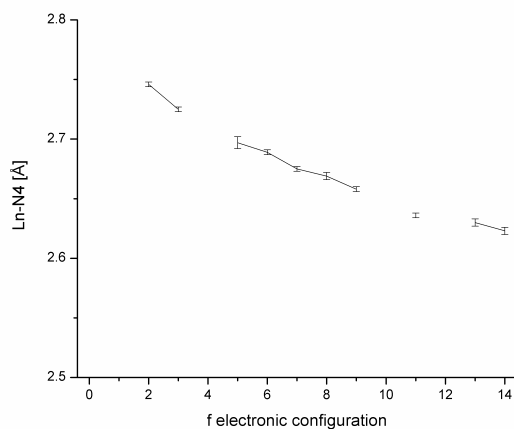

Figure S80. Bond length Ln-N4 vs. f electronic configuration.

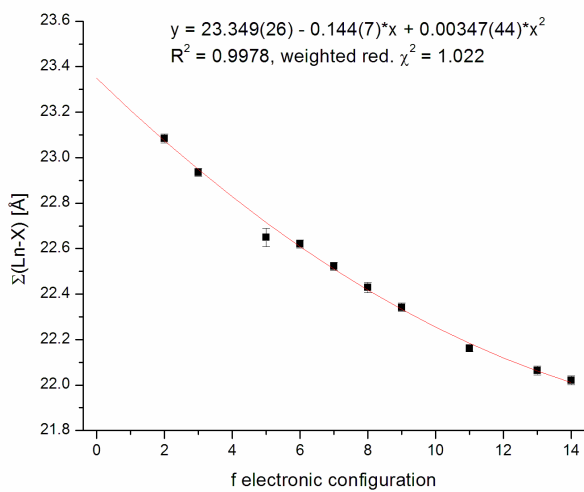

Figure S81. Sum of bond lengths Ln-X Ln-X (X = N, O) vs. f electronic configuration. Quadratic fit ( $\chi^2$ - weighting factor:  $\text{su}^2$ ).

Distances X-X (X = N,O):

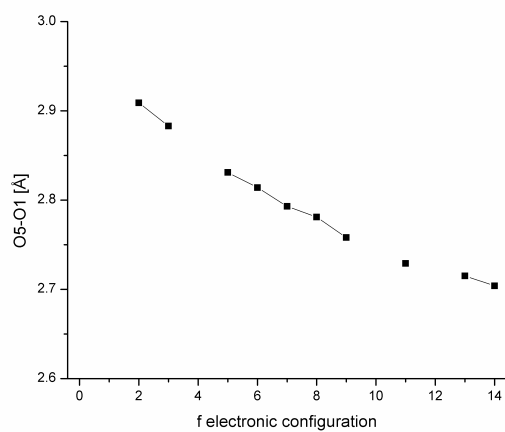

Figure S82. Distance O5-O1 vs. f electronic configuration.

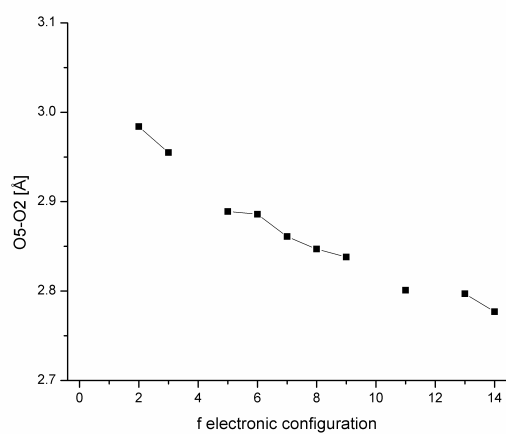

Figure S83. Distance O5-O2 vs. f electronic configuration.

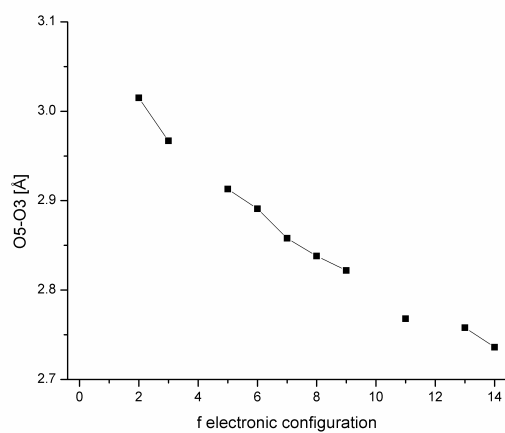

Figure S84. Distance O5-O3 vs. f electronic configuration.

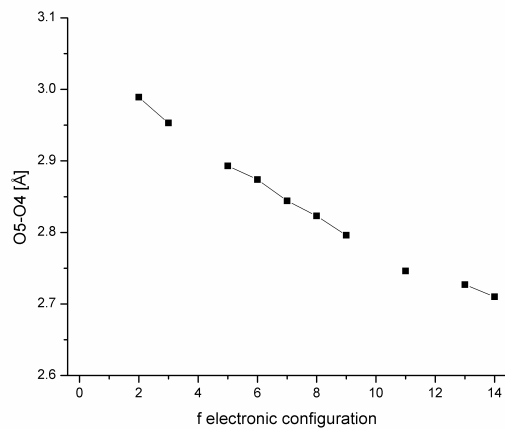

Figure S85. Distance O5-O4 vs. f electronic configuration.

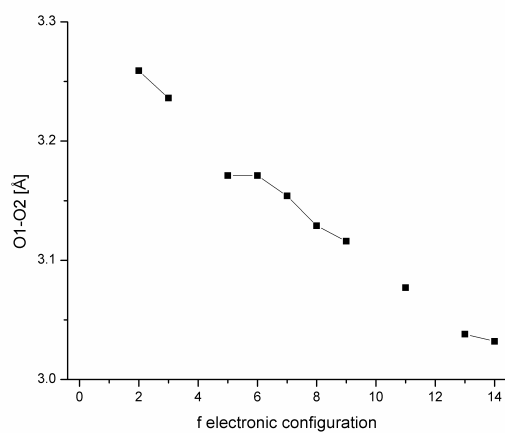

Figure S86. Distance O1-O2 vs. f electronic configuration.

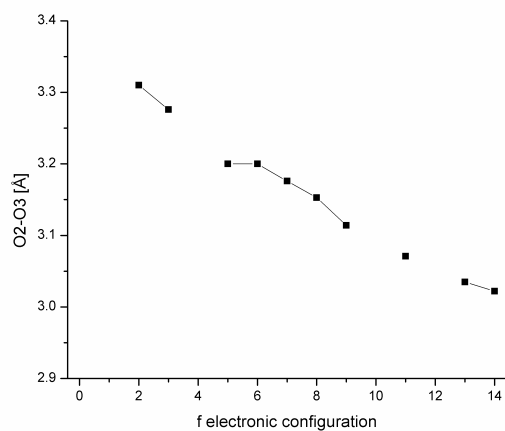

Figure S87. Distance O2-O3 vs. f electronic configuration.

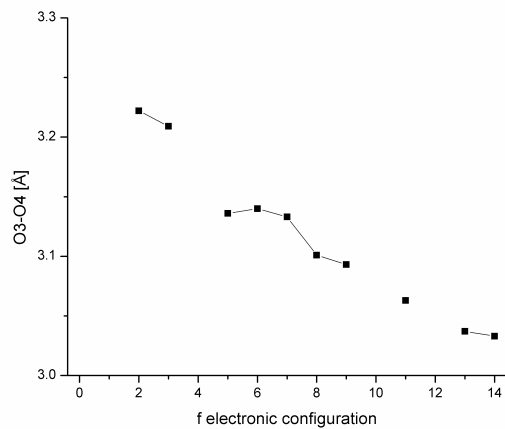

Figure S88. Distance O3-O4 vs. f electronic configuration.

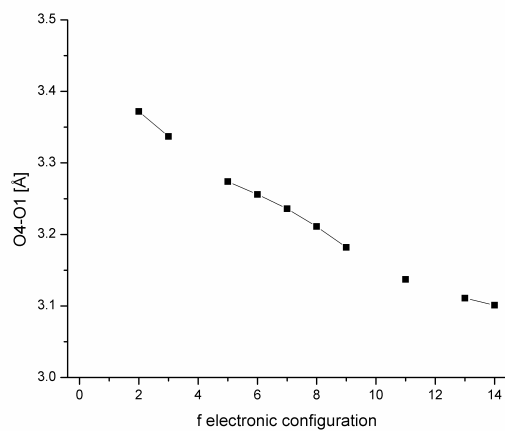

Figure S89. Distance O4-O1 vs. f electronic configuration.

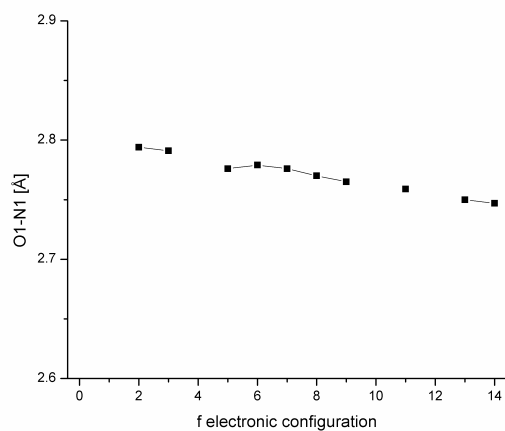

Figure S90. Distance O1-N1 vs. f electronic configuration.

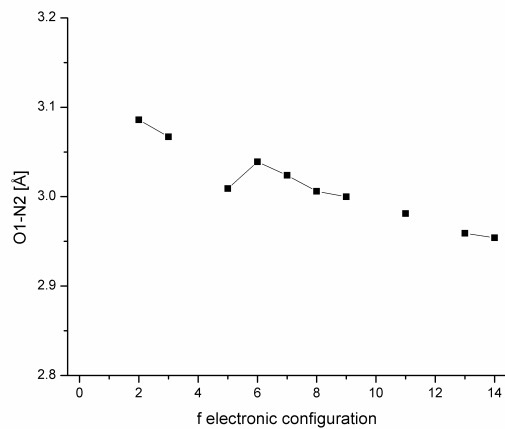

Figure S91. Distance O1-N2 vs. f electronic configuration.

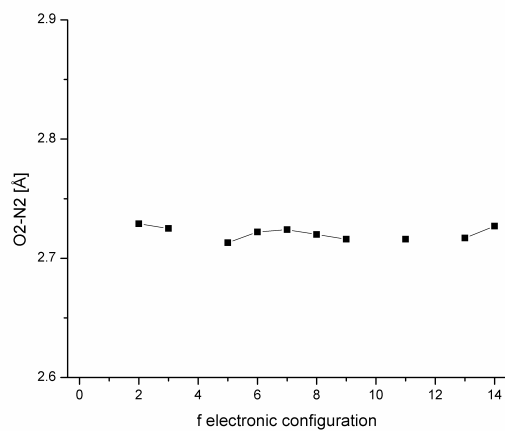

Figure S92. Distance O2-N2 vs. f electronic configuration.

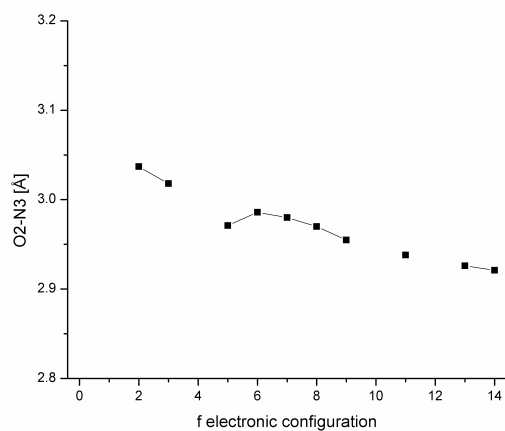

Figure S93. Distance O2-N3 vs. f electronic configuration.



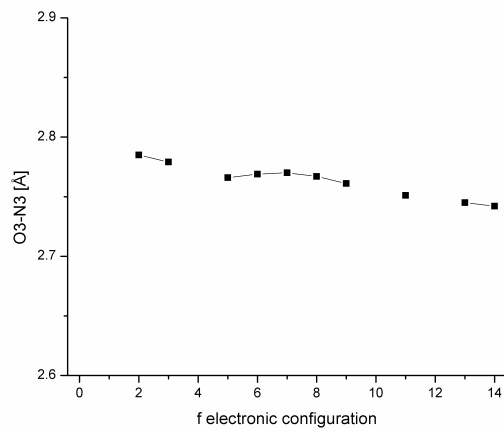

Figure S94. Distance O3-N3 vs. f electronic configuration.

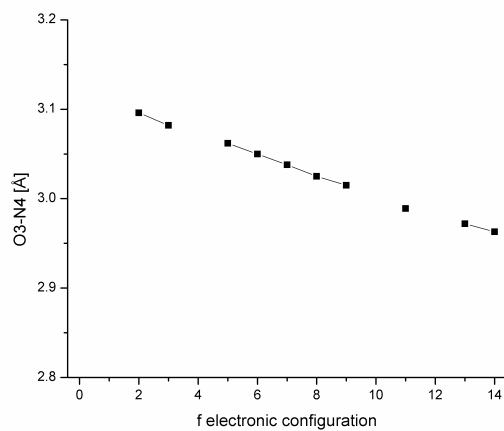

Figure S95. Distance O3-N4 vs. f electronic configuration.

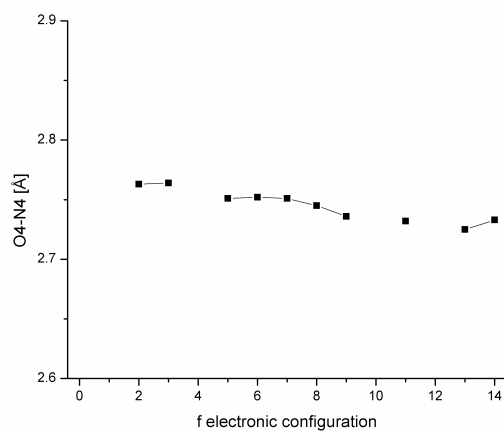

Figure S96. Distance O4-N4 vs. f electronic configuration.

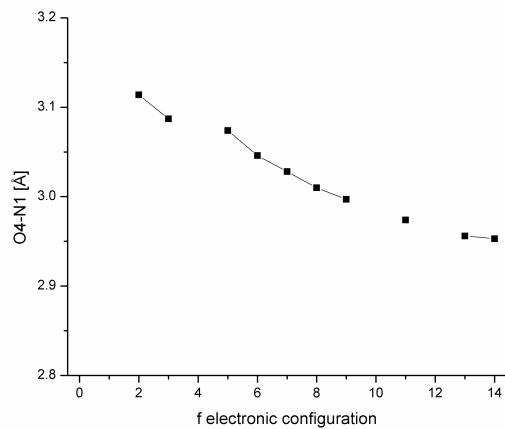

Figure S97. Distance O4-N1 vs. f electronic configuration.

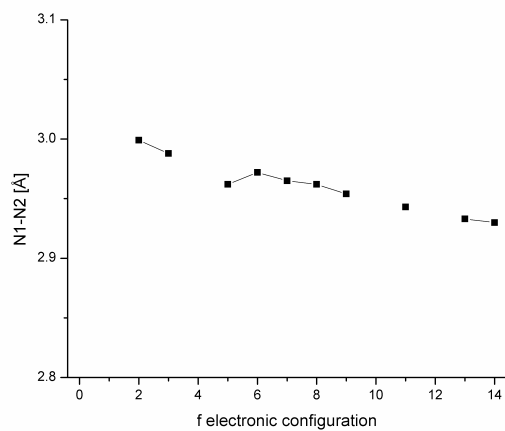

Figure S98. Distance N1-N2 vs. f electronic configuration.

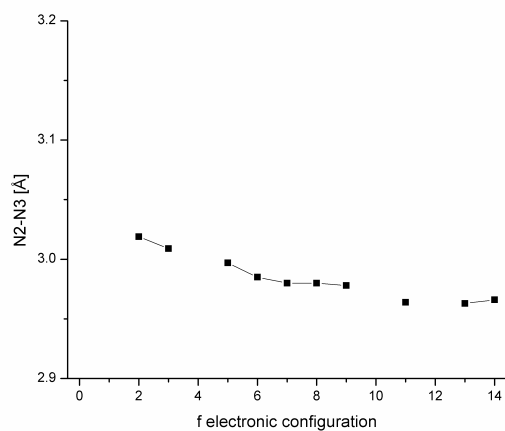

Figure S99. Distance N2-N3 vs. f electronic configuration.

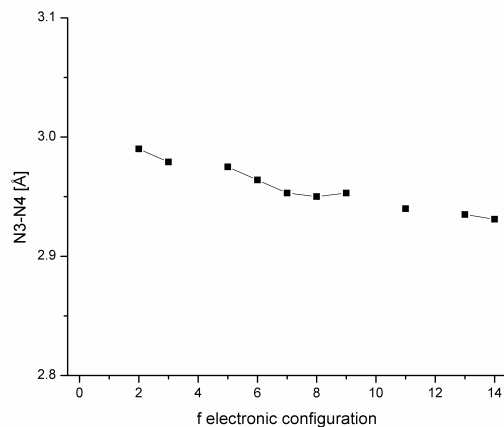

Figure S100. Distance N3-N4 vs. f electronic configuration.

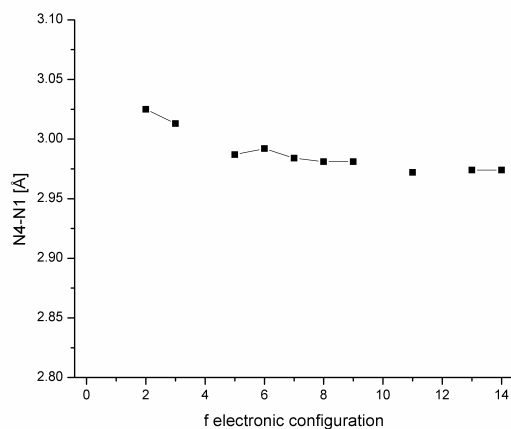

Figure S101. Distance N4-N1 vs. f electronic configuration.

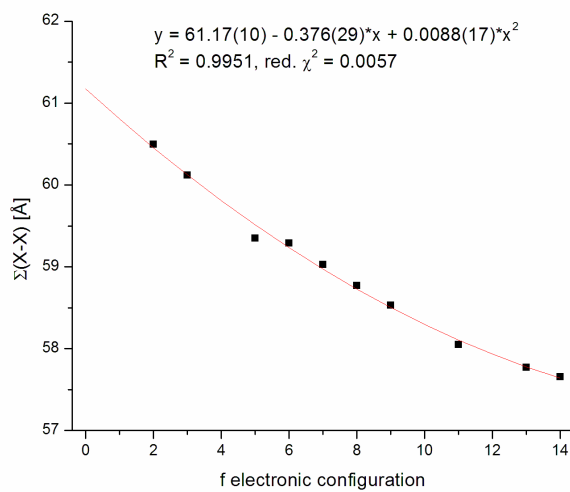

Figure S102. Sum of distance X-X (X = N, O) vs. f electronic configuration. Quadratic fit.

## 5 [Ln(H<sub>2</sub>O)<sub>9</sub>](EtOSO<sub>3</sub>)<sub>3</sub> Complexes<sup>12</sup>

### 5.1 Bond Lengths

Table S10. Bond lengths in [Ln(H<sub>2</sub>O)<sub>9</sub>](EtOSO<sub>3</sub>)<sub>3</sub>.<sup>12</sup>

| f electrons (Ln)                  | d <sub>Ln-O1</sub> (su) [Å] (6x) | d <sub>Ln-O2</sub> (su) [Å] (3x) | Σd <sub>Ln-O</sub> (su) [Å] |
|-----------------------------------|----------------------------------|----------------------------------|-----------------------------|
| 0 (La)                            | 2.517(1)                         | 2.616(3)                         | 22.950(15)                  |
| 1 (Ce)                            | 2.491(1)                         | 2.600(3)                         | 22.746(15)                  |
| 2 (Pr)                            | 2.470(2)                         | 2.583(3)                         | 22.569(21)                  |
| 3 (Nd)                            | 2.457(1)                         | 2.570(2)                         | 22.452(12)                  |
| 4 (Pm)                            | -                                | -                                | -                           |
| 5 (Sm)                            | 2.430(1)                         | 2.550(4)                         | 22.230(18)                  |
| 6 (Eu)                            | 2.415(1)                         | 2.542(3)                         | 22.116(15)                  |
| 7 (Gd)                            | 2.401(1)                         | 2.536(3)                         | 22.014(15)                  |
| 8 (Tb)                            | 2.382(2)                         | 2.527(3)                         | 21.873(21)                  |
| 9 (Dy)                            | 2.371(1)                         | 2.517(4)                         | 21.777(15)                  |
| 10 (Ho)                           | 2.362(2)                         | 2.511(4)                         | 21.705(24)                  |
| 11 (Er)                           | 2.352(2)                         | 2.503(3)                         | 21.621(21)                  |
| 12 (Tm)                           | 2.340(2)                         | 2.504(5)                         | 21.552(27)                  |
| 13 (Yb)                           | 2.324(2)                         | 2.503(3)                         | 21.453(21)                  |
| 14 (Lu)                           | 2.318(2)                         | 2.497(3)                         | 21.399(21)                  |
| d <sub>La</sub> / d <sub>Lu</sub> | 1.086                            | 1.048                            | 1.072                       |

### 5.2 O-O Distances

Table S11. Distances O-O (O bound to Ln) in [Ln(H<sub>2</sub>O)<sub>9</sub>](EtOSO<sub>3</sub>)<sub>3</sub>.<sup>12</sup>

| f electrons (Ln)                  | d <sub>O1'-O2</sub> [Å] (6x) | d <sub>O1-O2</sub> [Å] (6x) | d <sub>O1-O1'</sub> [Å] (3x) | d <sub>O1'-O1'</sub> [Å] (6x)* | Σd <sub>O-O</sub> [Å] |
|-----------------------------------|------------------------------|-----------------------------|------------------------------|--------------------------------|-----------------------|
| 0 (La)                            | 2.770                        | 3.058                       | 3.531                        | 3.108                          | 64.209                |
| 1 (Ce)                            | 2.753                        | 3.034                       | 3.509                        | 3.062                          | 63.621                |
| 2 (Pr)                            | 2.735                        | 3.009                       | 3.483                        | 3.033                          | 63.111                |
| 3 (Nd)                            | 2.726                        | 2.995                       | 3.475                        | 3.010                          | 62.811                |
| 4 (Pm)                            | -                            | -                           | -                            | -                              | -                     |
| 5 (Sm)                            | 2.704                        | 2.966                       | 3.444                        | 2.969                          | 62.166                |
| 6 (Eu)                            | 2.695                        | 2.952                       | 3.428                        | 2.948                          | 61.854                |
| 7 (Gd)                            | 2.683                        | 2.940                       | 3.402                        | 2.935                          | 61.554                |
| 8 (Tb)                            | 2.673                        | 2.920                       | 3.379                        | 2.909                          | 61.149                |
| 9 (Dy)                            | 2.661                        | 2.909                       | 3.369                        | 2.890                          | 60.867                |
| 10 (Ho)                           | 2.654                        | 2.901                       | 3.357                        | 2.878                          | 60.669                |
| 11 (Er)                           | 2.649                        | 2.884                       | 3.339                        | 2.868                          | 60.423                |
| 12 (Tm)                           | 2.648                        | 2.875                       | 3.325                        | 2.853                          | 60.231                |
| 13 (Yb)                           | 2.638                        | 2.865                       | 3.300                        | 2.833                          | 59.916                |
| 14 (Lu)                           | 2.633                        | 2.854                       | 3.285                        | 2.832                          | 59.769                |
| d <sub>La</sub> / d <sub>Lu</sub> | 1.052                        | 1.071                       | 1.075                        | 1.097                          | 1.074                 |

\* Distance not listed in the original publication; values calculated from the published coordinates (see ref. 12).

### 5.3 Trends in Bond Lengths and O-O Distances vs. f Electron Configuration

Bond Lengths:

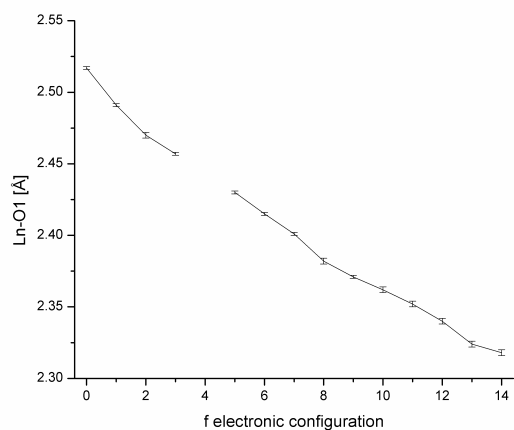

Figure S103. Bond length Ln-O1 vs. f electronic configuration.

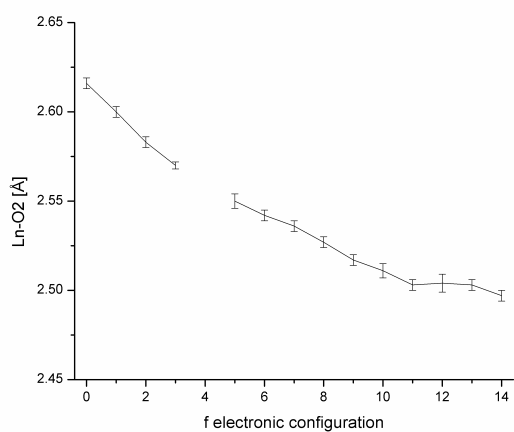

Figure S104. Bond length Ln-O2 vs. f electronic configuration.

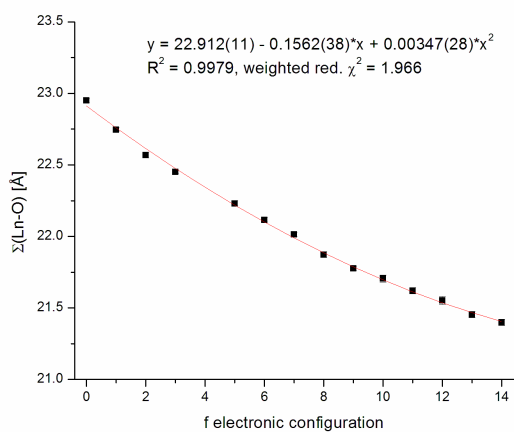

Figure S105. Sum of bond lengths Ln-O vs. f electronic configuration. Quadratic fit ( $\chi^2$ - weighting factor:  $su^{-2}$ ).

Distances O-O:

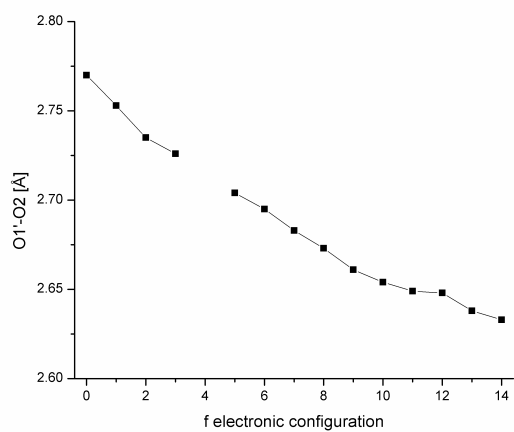

Figure S106. Distance O1'-O2 vs. f electronic configuration.

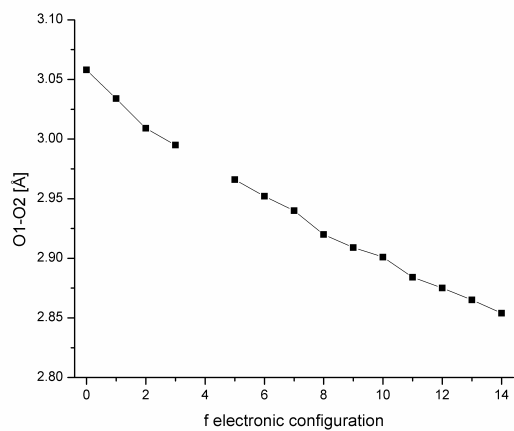

Figure S107. Distance O1-O2 vs. f electronic configuration.

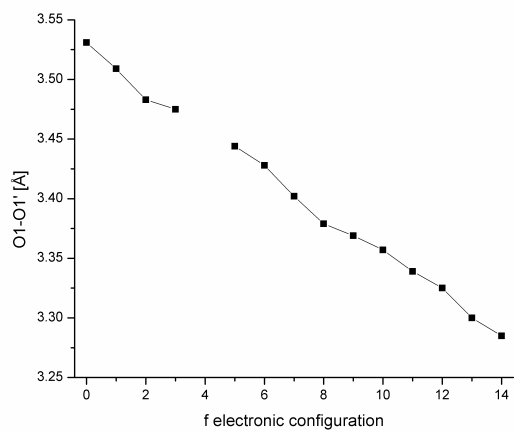

Figure S108. Distance O1-O1' vs. f electronic configuration.

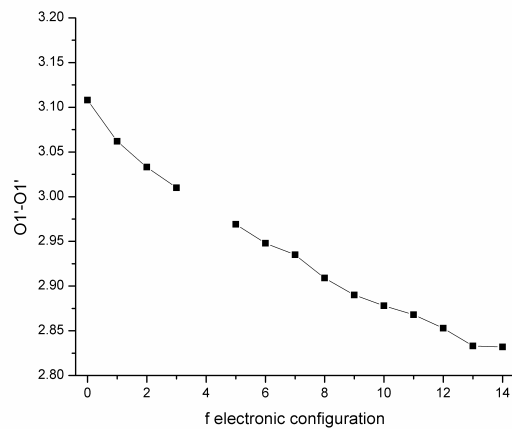

Figure S109. Distance O1'-O1' vs. f electronic configuration.

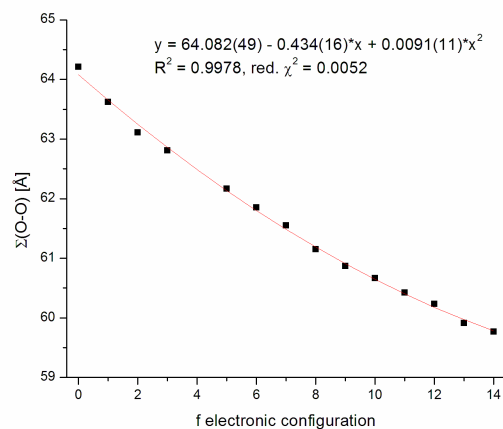

Figure S110. Sum of distances O-O vs. f electronic configuration. Quadratic fit ( $\chi^2$ - weighting factor:  $su^{-2}$ ).

## 6. The Average X-X Distance vs. the Average Ln-X Bond Length

Table S12. Average distances Ln-X and X-X (X=N,O; bound to Ln).

| f electrons<br>(Ln) | [Ln(TREN-1,2-<br>HOIQO)](H <sub>2</sub> O)]<br>avg. Ln-O [Å] | [Ln(TREN-1,2-<br>HOIQO)](H <sub>2</sub> O)]<br>avg. O-O [Å] | [Ln(tptz)(NO <sub>3</sub> ) <sub>3</sub><br>(H <sub>2</sub> O)]<br>avg. Ln-X [Å] | [Ln(tptz)(NO <sub>3</sub> ) <sub>3</sub><br>(H <sub>2</sub> O)]<br>avg. X-X [Å] | [Ln(PhMeCH-<br>DOTAM)](H <sub>2</sub> O)](OTf) <sub>3</sub><br>avg. Ln-X [Å] | [Ln(PhMeCH-<br>DOTAM)](H <sub>2</sub> O)](OTf) <sub>3</sub><br>avg. X-X [Å] | [Ln(H <sub>2</sub> O) <sub>9</sub> ]<br>(EtOSO <sub>3</sub> ) <sub>3</sub><br>avg. Ln-O [Å] | [Ln(H <sub>2</sub> O) <sub>9</sub> ]<br>(EtOSO <sub>3</sub> ) <sub>3</sub><br>avg. O-O [Å] | [Ln(TREN-<br>SAL)]<br>avg. Ln-X [Å] | [Ln(TREN-<br>SAL)]<br>avg. X-X [Å] |
|---------------------|--------------------------------------------------------------|-------------------------------------------------------------|----------------------------------------------------------------------------------|---------------------------------------------------------------------------------|------------------------------------------------------------------------------|-----------------------------------------------------------------------------|---------------------------------------------------------------------------------------------|--------------------------------------------------------------------------------------------|-------------------------------------|------------------------------------|
| 0 (La)              | 2.486                                                        | 3.152                                                       | 2.615                                                                            | 2.912                                                                           | -                                                                            | -                                                                           | 2.550                                                                                       | 3.058                                                                                      | -                                   | -                                  |
| 1 (Ce)              | 2.465                                                        | 3.125                                                       | 2.598                                                                            | 2.892                                                                           | -                                                                            | -                                                                           | 2.527                                                                                       | 3.030                                                                                      | 2.576                               | 3.344                              |
| 2 (Pr)              | 2.448                                                        | 3.104                                                       | 2.575                                                                            | 2.866                                                                           | 2.565                                                                        | 3.025                                                                       | 2.508                                                                                       | 3.005                                                                                      | 2.558                               | 3.322                              |
| 3 (Nd)              | 2.431                                                        | 3.083                                                       | 2.562                                                                            | 2.851                                                                           | 2.548                                                                        | 3.006                                                                       | 2.495                                                                                       | 2.991                                                                                      | 2.547                               | 3.316                              |
| 4 (Pm)              | -                                                            | -                                                           | -                                                                                | -                                                                               | -                                                                            | -                                                                           | -                                                                                           | -                                                                                          | -                                   | -                                  |
| 5 (Sm)              | 2.407                                                        | 3.050                                                       | 2.536                                                                            | 2.822                                                                           | 2.517                                                                        | 2.968                                                                       | 2.470                                                                                       | 2.960                                                                                      | 2.517                               | 3.272                              |
| 6 (Eu)              | 2.393                                                        | 3.033                                                       | 2.521                                                                            | 2.806                                                                           | 2.513                                                                        | 2.964                                                                       | 2.457                                                                                       | 2.945                                                                                      | 2.510                               | 3.264                              |
| 7 (Gd)              | 2.381                                                        | 3.017                                                       | 2.513                                                                            | 2.796                                                                           | 2.502                                                                        | 2.951                                                                       | 2.446                                                                                       | 2.931                                                                                      | 2.496                               | 3.250                              |
| 8 (Tb)              | 2.362                                                        | 2.993                                                       | 2.498                                                                            | 2.780                                                                           | 2.492                                                                        | 2.938                                                                       | 2.430                                                                                       | 2.912                                                                                      | 2.478                               | 3.223                              |
| 9 (Dy)              | 2.355                                                        | 2.984                                                       | 2.488                                                                            | 2.769                                                                           | 2.482                                                                        | 2.927                                                                       | 2.420                                                                                       | 2.898                                                                                      | 2.473                               | 3.212                              |
| 10 (Ho)             | 2.340                                                        | 2.965                                                       | 2.480                                                                            | 2.759                                                                           | -                                                                            | -                                                                           | 2.412                                                                                       | 2.889                                                                                      | 2.456                               | 3.198                              |
| 11 (Er)             | 2.334                                                        | 2.957                                                       | 2.470                                                                            | 2.748                                                                           | 2.462                                                                        | 2.903                                                                       | 2.402                                                                                       | 2.877                                                                                      | -                                   | -                                  |
| 12 (Tm)             | 2.324                                                        | 2.947                                                       | 2.465                                                                            | 2.741                                                                           | -                                                                            | -                                                                           | 2.395                                                                                       | 2.868                                                                                      | -                                   | -                                  |
| 13 (Yb)             | 2.310                                                        | 2.925                                                       | 2.455                                                                            | 2.733                                                                           | 2.452                                                                        | 2.889                                                                       | 2.384                                                                                       | 2.853                                                                                      | 2.428                               | 3.154                              |
| 14 (Lu)             | 2.314                                                        | 2.929                                                       | -                                                                                | -                                                                               | 2.447                                                                        | 2.883                                                                       | 2.378                                                                                       | 2.846                                                                                      | -                                   | -                                  |

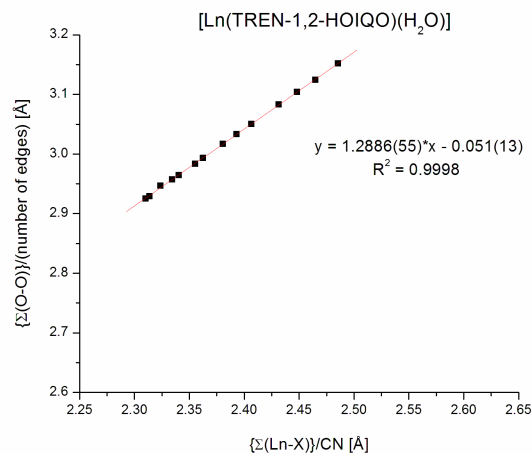

Figure S111. Average O-O vs. average Ln-O in [Ln(TREN-1,2-HOIQO)](H<sub>2</sub>O)].

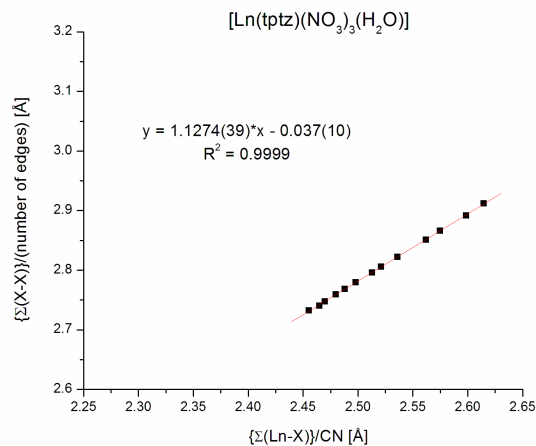

Figure S112. Average O-O vs. average Ln-O in [Ln(tptz)(NO<sub>3</sub>)<sub>3</sub>](H<sub>2</sub>O)].



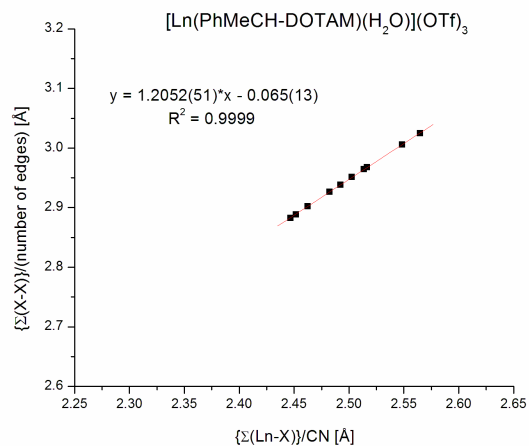

Figure S113. Average O-O vs. average Ln-O in [Ln(PhMeCH-DOTAM)(H<sub>2</sub>O)](OTf)<sub>3</sub>.

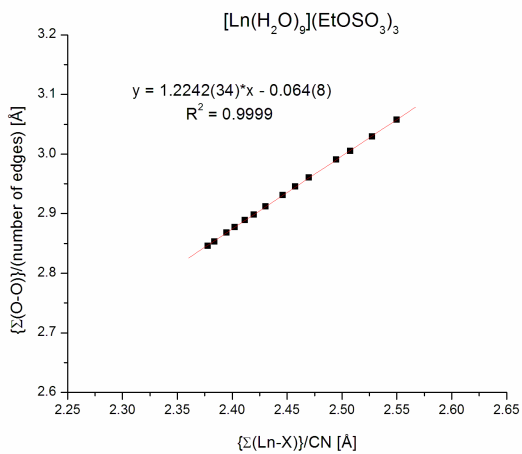

Figure S114. Average O-O vs. average Ln-O in [Ln(H<sub>2</sub>O)<sub>9</sub>](EtOSO<sub>3</sub>)<sub>3</sub>.

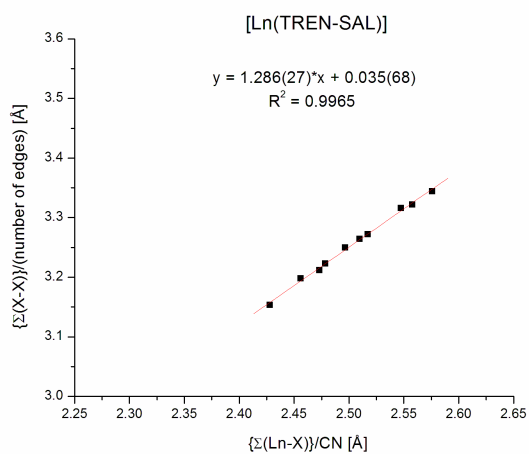

Figure S115. Average X-X vs. average Ln-X in [Ln(TREN-SAL)].

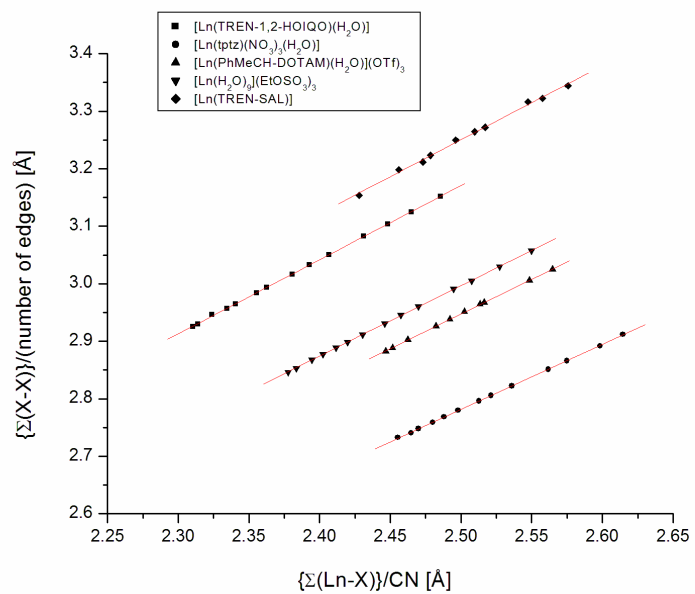

Figure S116. Average X-X vs. average Ln-X in all complexes.

## 7. References

- <sup>1</sup> ORTEP-3 for Windows: Farrugia, L.J. *J. Appl. Cryst.* **1997**, *30*, 565.
- <sup>2</sup> Seitz, M.; Pluth, M.D.; Raymond, K.N. *Inorg. Chem.* **2007**, *46*, 351-353.
- <sup>3</sup> For the definition of the shape measure S see: Xu, J.; Radkov, E.; Ziegler, M.; Raymond, K.N. *Inorg. Chem.* **2000**, *39*, 4156-4164.
- <sup>4</sup> Bernhardt, P.V.; Flanagan, B.M.; Riley, M.J.; *Aust. J. Chem.* **2001**, *54*, 229-232.
- <sup>5</sup> Bernhardt, P.V.; Flanagan, B.M.; Riley, M.J.; *Aust. J. Chem.* **2000**, *53*, 229-231.
- <sup>6</sup> Kanesato, M.; Yokoyama, T.; *Anal. Sci.* **2000**, *16*, 335-336.
- <sup>7</sup> Kanesato, M.; Yokoyama, T.; *Chem. Lett.* **1999**, 137-138.
- <sup>8</sup> Cotton, S.A.; Franckevicius, V.; Mahon, M.F.; Ooi, L.L.; Raithby, P.R.; Teat, S.J. *Polyhedron* **2006**, *25*, 1057-1068.
- <sup>9</sup> Parker, D.; Puschmann, H.; Batsanov, A.S.; Senanayake, K. *Inorg. Chem.* **2003**, *42*, 8646-8651.
- <sup>10</sup> Aime, S.; Barge, A.; Batsanov, A.S.; Botta, M.; Delli Castelli, D.; Fedeli, F.; Mortillaro, A.; Parker, D.; Puschmann, H. *Chem. Commun.* **2002**, 1120-1121.
- <sup>11</sup> Batsanov, A.S.; Beeby, A.; Bruce, J.I.; Howard, J.A.K.; Kenwright, A.M.; Parker, D. *Chem. Commun.* **1999**, 1011-1012.
- <sup>12</sup> Gerkin, R.E.; Reppart, W.J. *Acta Crystallogr. C* **1984**, *40*, 781-786.
